# Supplementary material for: Significantly different clinical phenotypes associated with mutations in synthesis and transamidase+remodeling glycosylphosphatidylinositol (GPI)-anchor biosynthesis genes
Source: PubMed Central journal article supplement (PMC7001271; doi:10.1186/s13023-020-1313-0), 2020-02-04
Supplement: 13023_2020_1313_MOESM1_ESM.pdf [file 13023_2020_1313_MOESM1_ESM.pdf]

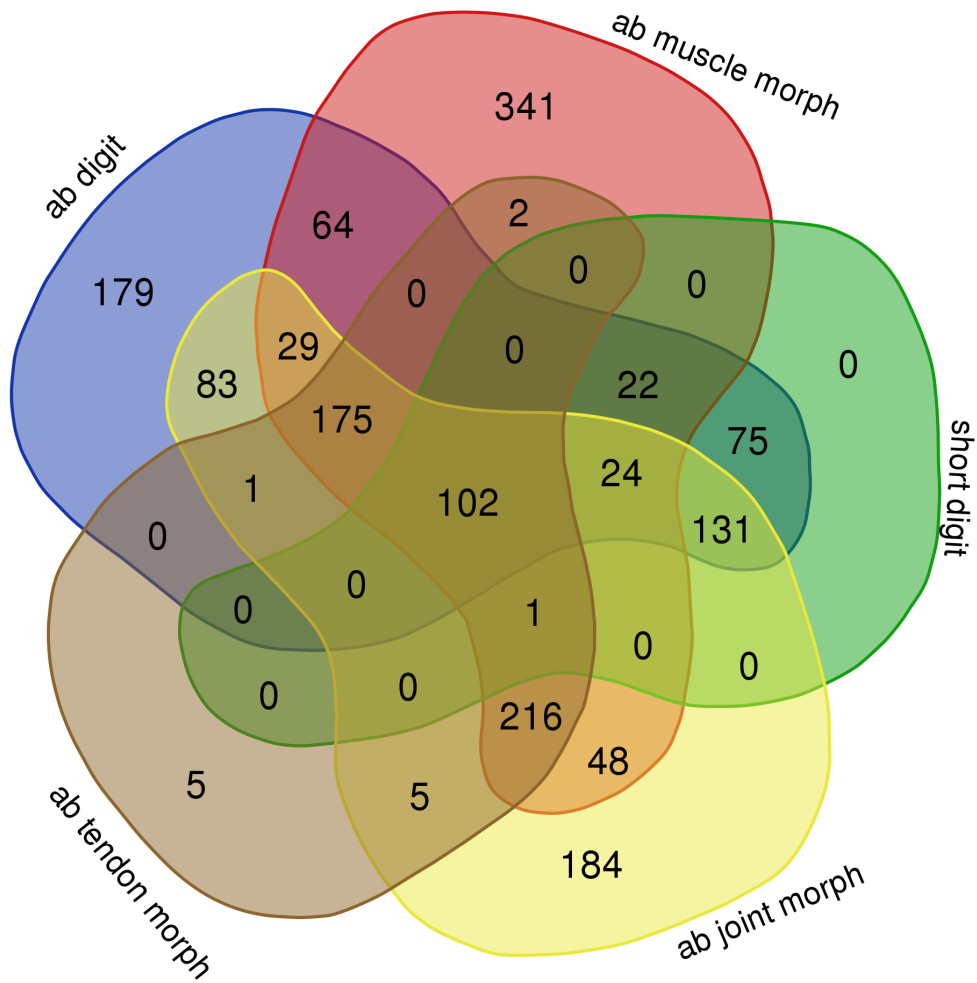

Figure S1: Venn diagram representing overlaps of genes associated with the indicated phenotypic abnormalities in the Synthesis group.

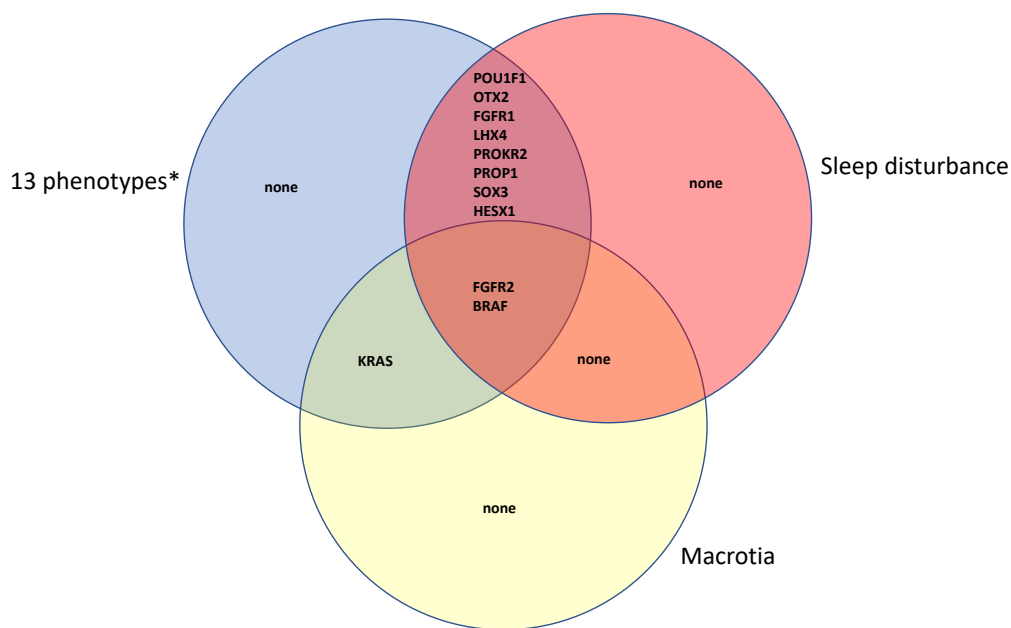

Figure S2: Venn diagram representing genes found in at diseases that overlap by at least 14 phenotypic abnormalities. Two genes, *FGFR2* and *BRAF*, were associated with Mendelian diseases that are characterized by all 15 phenotypic features. *KRAS* was associated with the 13 phenotypes as well as Macrotia. The 8 genes shown were listed with the 13 phenotypic features and Sleep disturbance. The 13 phenotypes were: Abnormal bone density, Abnormal bone ossification, Abnormal bone structure, Abnormality of nose, Behavioral abnormality, Cleft palate, Hard palate, Intellectual disability, Neurodevelopmental delay, Neurodevelopmental abnormality, Oral cleft, Osteopenia, Reduced bone density.

Table **S1**: Case reports included in the present work. The gene, patient id, and a list of the HPO terms that we curated for each patient are shown. S: Synthesis group. T+R: Transamidase+Remodeling group.

| Gene | Patient ID | HPOs                                                                                                                                                                                                                                                                                                                                                                                                                                           | Group | PMID     |
|------|------------|------------------------------------------------------------------------------------------------------------------------------------------------------------------------------------------------------------------------------------------------------------------------------------------------------------------------------------------------------------------------------------------------------------------------------------------------|-------|----------|
| DPM1 | PY         | HP:0012448, HP:0004322, HP:0001643, HP:0100704, HP:0002015, HP:0002104, HP:0001250, HP:0000822, HP:0001272, HP:0000486, HP:0003186, HP:0005484, HP:0003236, HP:0007333                                                                                                                                                                                                                                                                         | S     | 10642597 |
| DPM1 | CH         | HP:0012448, HP:0006801, HP:0000174, HP:0002353, HP:0010844, HP:0002374, HP:0100704, HP:0001250, HP:0011398, HP:0001263, HP:0000961, HP:0005484, HP:0001028, HP:0005949, HP:0000494, HP:0003259, HP:0001009, HP:0000271                                                                                                                                                                                                                         | S     | 10642597 |
| DPM1 | Patient    | HP:0001270, HP:0001250, HP:0011398, HP:0002457, HP:0005484, HP:0012385, HP:0009276, HP:0040081                                                                                                                                                                                                                                                                                                                                                 | S     | 23856421 |
| DPM2 | Patient 3  | HP:0001999, HP:0002058, HP:0002650, HP:0002421, HP:0002197, HP:0011968, HP:0011947, HP:0040081, HP:0002803, HP:0030951, HP:0001250, HP:0011398, HP:0001263, HP:0003198, HP:0001321, HP:0001320, HP:0001344, HP:0005484                                                                                                                                                                                                                         | S     | 23109149 |
| DPM2 | Patient 2  | HP:0001999, HP:0002058, HP:0002650, HP:0002421, HP:0002197, HP:0011968, HP:0011947, HP:0040081, HP:0002803, HP:0030951, HP:0000689, HP:0001250, HP:0000347, HP:0011398, HP:0001263, HP:0000486, HP:0003198, HP:0001321, HP:0001320, HP:0001344, HP:0005484                                                                                                                                                                                     | S     | 23109149 |
| DPM2 | Patient 1  | HP:0002194, HP:0025404, HP:0002421, HP:0012157, HP:0002205, HP:0011947, HP:0000617, HP:0002910, HP:0000219, HP:0002705, HP:0006380, HP:0001250, HP:0000347, HP:0003196, HP:0011398, HP:0011344, HP:0001561, HP:0005484, HP:0100360, HP:0000294, HP:0008936, HP:0002240, HP:0002002, HP:0040246, HP:0002553, HP:0002098, HP:0030903, HP:0030235, HP:0002987, HP:0002878, HP:0000648, HP:0010460, HP:0100543, HP:0000601, HP:0000271, HP:0002090 | S     | 23109149 |
| DPM3 | Patient    | HP:0004302, HP:0003805, HP:0004322, HP:0003707, HP:0025502, HP:0001644, HP:0001763, HP:0003160, HP:0002401, HP:0002910, HP:0002515, HP:0003487, HP:0005109, HP:0003560, HP:0003198, HP:0003701, HP:0009053, HP:0001928, HP:0003259, HP:0003555, HP:0001315                                                                                                                                                                                     | S     | 19576565 |
| DPM3 | Patient    | HP:0004302, HP:0003805, HP:0004322, HP:0003707, HP:0025502, HP:0001644, HP:0001763, HP:0003160, HP:0002401, HP:0002910, HP:0002515, HP:0003487, HP:0005109, HP:0003560, HP:0003198, HP:0003701, HP:0009053, HP:0001928, HP:0003259, HP:0003555, HP:0001315                                                                                                                                                                                     | S     | 19576565 |

*Continued on next page*

Table S1 – Continued from previous page

| Gene  | Patient ID         | HPOs                                                                                                                                                                                                                                                                                                                                                                                                                                                                                                                                                 | Group | PMID     |
|-------|--------------------|------------------------------------------------------------------------------------------------------------------------------------------------------------------------------------------------------------------------------------------------------------------------------------------------------------------------------------------------------------------------------------------------------------------------------------------------------------------------------------------------------------------------------------------------------|-------|----------|
| MPDU1 | Patient S          | HP:0040189, HP:0001250, HP:0008064, HP:0003510,<br>HP:0011344, HP:0001541, HP:0001276, HP:0011968,<br>HP:0001510, HP:0012050, HP:0040189, HP:0040196,<br>HP:0001698, HP:0001873, HP:0011968, HP:0002119,<br>HP:0002521, HP:0000803, HP:0000648, HP:0012050,<br>HP:0001250, HP:0003510, HP:0008064, HP:0011344,<br>HP:0001541, HP:0001276, HP:0001510, HP:0012704,<br>HP:0040189, HP:0001319, HP:0011968, HP:0012050,<br>HP:0001250, HP:0003510, HP:0008064, HP:0011344,<br>HP:0001541, HP:0000233, HP:0001276, HP:0000242,<br>HP:0001510, HP:0000260 | S     | 11733564 |
| PIGA  | III-7<br>Family B  | HP:0012469, HP:0001263, HP:0002521                                                                                                                                                                                                                                                                                                                                                                                                                                                                                                                   | S     | 24357517 |
| PIGA  | III-13<br>Family B | HP:0001250, HP:0001263, HP:0002521, HP:0011947                                                                                                                                                                                                                                                                                                                                                                                                                                                                                                       | S     | 24357517 |
| PIGA  | III-11<br>Family B | HP:0002133, HP:0002069, HP:0001263, HP:0002521,<br>HP:0000969                                                                                                                                                                                                                                                                                                                                                                                                                                                                                        | S     | 24357517 |
| PIGA  | III-8<br>Family B  | HP:0012469, HP:0001272, HP:0001263, HP:0002521,<br>HP:0002500, HP:0002090                                                                                                                                                                                                                                                                                                                                                                                                                                                                            | S     | 24357517 |
| PIGA  | IV-2<br>Family B   | HP:0001270, HP:0008936, HP:0001250, HP:0001263,<br>HP:0002521, HP:0001336                                                                                                                                                                                                                                                                                                                                                                                                                                                                            | S     | 24357517 |
| PIGA  | IV-4               | HP:0002079, HP:0002123, HP:0001623, HP:0001643,<br>HP:0002878, HP:0002139, HP:0003155, HP:0002705,<br>HP:0001371, HP:0001252, HP:0001561, HP:0001321,<br>HP:0025116, HP:0011330, HP:0001414, HP:0001348                                                                                                                                                                                                                                                                                                                                              | S     | 22305531 |
| PIGA  | IV-2               | HP:0002079, HP:0006956, HP:0005280, HP:0001623,<br>HP:0000076, HP:0001631, HP:0001792, HP:0002104,<br>HP:0002714, HP:0006380, HP:0003273, HP:0000212,<br>HP:0001321, HP:0001331, HP:0009381, HP:0001169,<br>HP:0000272, HP:0000470, HP:0000160, HP:0002123,<br>HP:0002987, HP:0000239, HP:0000269, HP:0000201,<br>HP:0000463, HP:0000396, HP:0000582, HP:0001348,<br>HP:0002090, HP:0000081                                                                                                                                                          | S     | 22305531 |
| PIGA  | IV-4               | HP:0002123, HP:0002079, HP:0001250, HP:0001371,<br>HP:0010851, HP:0011398, HP:0000076, HP:0001347,<br>HP:0012430, HP:0000271, HP:0003155, HP:0002123,<br>HP:0002079, HP:0001371, HP:0010851, HP:0011398,<br>HP:0001561, HP:0001367, HP:0001347, HP:0012430,<br>HP:0000271                                                                                                                                                                                                                                                                            | S     | 24706016 |
| PIGA  | 5                  | HP:0002187, HP:0003155, HP:0002079, HP:0011398,<br>HP:0002521, HP:0001347, HP:0002445, HP:0000271                                                                                                                                                                                                                                                                                                                                                                                                                                                    | S     | 24706016 |
| PIGA  | 4                  | HP:0003155, HP:0002079, HP:0001250, HP:0001371,<br>HP:0002342, HP:0001367, HP:0002510, HP:0002521,<br>HP:0003429, HP:0000271, HP:0000717                                                                                                                                                                                                                                                                                                                                                                                                             | S     | 24706016 |
| PIGA  | 3                  | HP:0002187, HP:0002197, HP:0010818, HP:0000717                                                                                                                                                                                                                                                                                                                                                                                                                                                                                                       | S     | 24706016 |
| PIGA  | 2                  | HP:0002187, HP:0003155, HP:0002123, HP:0002079,<br>HP:0001250, HP:0001367, HP:0002521, HP:0002510,<br>HP:0001336, HP:0012430, HP:0000271                                                                                                                                                                                                                                                                                                                                                                                                             | S     | 24706016 |
| PIGA  | 1                  | HP:0002187, HP:0002079, HP:0010851, HP:0001371,<br>HP:0011398, HP:0000076, HP:0001561, HP:0005692,<br>HP:0012430, HP:0002445, HP:0000271, HP:0010818                                                                                                                                                                                                                                                                                                                                                                                                 | S     | 24706016 |
| PIGA  | IV-2               | HP:0002123, HP:0002079, HP:0001371, HP:0001250,<br>HP:0010851, HP:0011398, HP:0000076, HP:0001347,<br>HP:0012430, HP:0000271                                                                                                                                                                                                                                                                                                                                                                                                                         | S     | 24706016 |

Continued on next page

Table S1 – Continued from previous page

| Gene | Patient ID   | HPOs                                                                                                                                                                                                                                                                                                                                                                                                                                                                                                                                                                                                                                           | Group | PMID     |
|------|--------------|------------------------------------------------------------------------------------------------------------------------------------------------------------------------------------------------------------------------------------------------------------------------------------------------------------------------------------------------------------------------------------------------------------------------------------------------------------------------------------------------------------------------------------------------------------------------------------------------------------------------------------------------|-------|----------|
| PIGA | IV-3         | HP:0001939, HP:0003121, HP:0001433, HP:0003487,<br>HP:0003700, HP:0001257, HP:0001397, HP:0000365,<br>HP:0002078, HP:0000496, HP:0002240, HP:0000684,<br>HP:0001298, HP:0001251, HP:0000248, HP:0001332,<br>HP:0003281, HP:0100704, HP:0001250, HP:0011398,<br>HP:0040130                                                                                                                                                                                                                                                                                                                                                                      | S     | 24259288 |
| PIGA | III-10       | HP:0040134, HP:0001712, HP:0001744, HP:0002174,<br>HP:0012103, HP:0001873, HP:0001760, HP:0007190,<br>HP:0200034, HP:0009909, HP:0002529, HP:0001250,<br>HP:0001371, HP:0011952, HP:0000684, HP:0001541,<br>HP:0001298, HP:0005484, HP:0001399, HP:0000496,<br>HP:0001939, HP:0001357, HP:0002240, HP:0002133,<br>HP:0006349, HP:0004322, HP:0002650, HP:0100704,<br>HP:0002753, HP:0002119, HP:0002599, HP:0000029,<br>HP:0003202, HP:0000687, HP:0001257, HP:0000691,<br>HP:0003765, HP:0000980, HP:0001413, HP:0002171                                                                                                                      | S     | 24259288 |
| PIGA | III-9        | HP:0002133, HP:0008936, HP:0100704, HP:0002120,<br>HP:0002540, HP:0030903, HP:0001182, HP:0011951,<br>HP:0001250, HP:0000365, HP:0001344, HP:0005484,<br>HP:0001433, HP:0001336, HP:0009085, HP:0001348,<br>HP:0000280                                                                                                                                                                                                                                                                                                                                                                                                                         | S     | 24259288 |
| PIGA | II:2         | HP:0002123, HP:0001520, HP:0012736, HP:0012385,<br>HP:0001371, HP:0002236, HP:0006191, HP:0005484,<br>HP:0002063, HP:0012745, HP:0000324, HP:0012469,<br>HP:0000637, HP:0008936, HP:0004673, HP:0005989,<br>HP:0000248, HP:0002705, HP:0000316, HP:0002267,<br>HP:0002521, HP:0001250, HP:0000474, HP:0001357,<br>HP:0005469, HP:0000311, HP:0000337, HP:0100538,<br>HP:0002056, HP:0001488, HP:0002835, HP:0000545,<br>HP:0004308, HP:0002059, HP:0000365, HP:0000126,<br>HP:0004446, HP:0006994, HP:0002104, HP:0002240,<br>HP:0001667, HP:0000543, HP:0003155, HP:0007370,<br>HP:0030515, HP:0000556, HP:0001103, HP:0031145,<br>HP:0031145 | S     | 25885527 |
| PIGA | III-1        | HP:0009890, HP:0002079, HP:0002271, HP:0002376,<br>HP:0001631, HP:0001695, HP:0001671, HP:0002059,<br>HP:0002104, HP:0001250, HP:0000674, HP:0001561,<br>HP:0000288, HP:0012704, HP:0012429, HP:0002373,<br>HP:0008936, HP:0002266, HP:0002795, HP:0002197,<br>HP:0002119, HP:0003270, HP:0003155, HP:0001263,<br>HP:0200134, HP:0000233, HP:0009085, HP:0000582                                                                                                                                                                                                                                                                               | S     | 24259184 |
| PIGA | Older twin   | HP:0002133, HP:0005280, HP:0002123, HP:0002179,<br>HP:0002069, HP:0002421, HP:0025404, HP:0002376,<br>HP:0012001, HP:0000817, HP:0000316, HP:0001250,<br>HP:0011168, HP:0001252, HP:0000463                                                                                                                                                                                                                                                                                                                                                                                                                                                    | S     | 29502866 |
| PIGA | Younger twin | HP:0002133, HP:0005280, HP:0002179, HP:0002069,<br>HP:0002421, HP:0025404, HP:0002376, HP:0012001,<br>HP:0000817, HP:0000316, HP:0001250, HP:0001252,<br>HP:0000463                                                                                                                                                                                                                                                                                                                                                                                                                                                                            | S     | 29502866 |
| PIGC | FamilyA II-4 | HP:0001270, HP:0002069, HP:0001250, HP:0001263,<br>HP:0010864, HP:0000750, HP:0031491                                                                                                                                                                                                                                                                                                                                                                                                                                                                                                                                                          | S     | 27694521 |
| PIGC | FamilyA II-2 | HP:0001270, HP:0002069, HP:0001250, HP:0001263,<br>HP:0010864, HP:0000750, HP:0031491, HP:0100702                                                                                                                                                                                                                                                                                                                                                                                                                                                                                                                                              | S     | 27694521 |
| PIGC | FamilyB II-1 | HP:0001250, HP:0001263, HP:0001249                                                                                                                                                                                                                                                                                                                                                                                                                                                                                                                                                                                                             | S     | 27694521 |

Continued on next page

Table S1 – Continued from previous page

| Gene | Patient ID | HPOs                                                                                                                                                                                                                                                                                                                                                                                                                                                                                                                                                                                                                                                                                           | Group | PMID     |
|------|------------|------------------------------------------------------------------------------------------------------------------------------------------------------------------------------------------------------------------------------------------------------------------------------------------------------------------------------------------------------------------------------------------------------------------------------------------------------------------------------------------------------------------------------------------------------------------------------------------------------------------------------------------------------------------------------------------------|-------|----------|
| PIGG | JP01       | HP:0001250, HP:0004396, HP:0001263, HP:0000750, HP:0001252, HP:0001321, HP:0001510, HP:0002059, HP:0000717                                                                                                                                                                                                                                                                                                                                                                                                                                                                                                                                                                                     | S     | 26996948 |
| PIGG | PK01       | HP:0001263, HP:0001250, HP:0006829, HP:0007370, HP:0011343, HP:0001344, HP:0000729, HP:0008855, HP:0030047                                                                                                                                                                                                                                                                                                                                                                                                                                                                                                                                                                                     | S     | 26996948 |
| PIGG | PK02       | HP:0001263, HP:0001250, HP:0006829, HP:0007370, HP:0011343, HP:0001344, HP:0000729, HP:0008855, HP:0030047                                                                                                                                                                                                                                                                                                                                                                                                                                                                                                                                                                                     | S     | 26996948 |
| PIGG | EG01       | HP:0001250, HP:0001382, HP:0011398, HP:0011343, HP:0001263, HP:0006829, HP:0007370, HP:0000729, HP:0001344, HP:0008855, HP:0030047                                                                                                                                                                                                                                                                                                                                                                                                                                                                                                                                                             | S     | 26996948 |
| PIGG | EG02       | HP:0001250, HP:0001382, HP:0011343, HP:0001263, HP:0006829, HP:0007370, HP:0000729, HP:0001344, HP:0008855, HP:0030047                                                                                                                                                                                                                                                                                                                                                                                                                                                                                                                                                                         | S     | 26996948 |
| PIGH | Proband    | HP:0002373, HP:0045045, HP:0002311, HP:0012343, HP:0000717, HP:0001290, HP:0000218, HP:0011343, HP:0000750, HP:0010529, HP:0001007                                                                                                                                                                                                                                                                                                                                                                                                                                                                                                                                                             | S     | 29603516 |
| PIGL | Patient 10 | HP:0100806, HP:0002098, HP:0000126, HP:0002644, HP:0002136, HP:0000316, HP:0003155, HP:0001250, HP:0001263, HP:0001156, HP:0000972, HP:0008070, HP:0000396, HP:0007503, HP:0000480, HP:0001249                                                                                                                                                                                                                                                                                                                                                                                                                                                                                                 | S     | 29473937 |
| PIGL | girl       | HP:0006956, HP:0005280, HP:0002194, HP:0002421, HP:0002750, HP:0010546, HP:0004042, HP:0001792, HP:0011927, HP:0000637, HP:0000218, HP:0001250, HP:0011398, HP:0000684, HP:0000486, HP:0000365, HP:0010804, HP:0000280, HP:0000158, HP:0002789, HP:0000316, HP:0003155, HP:0011800, HP:0001320, HP:0000364, HP:0000463, HP:0001344, HP:0000293, HP:0006956, HP:0005280, HP:0002194, HP:0002421, HP:0002750, HP:0010546, HP:0004042, HP:0001792, HP:0011927, HP:0000637, HP:0000218, HP:0001250, HP:0011398, HP:0000684, HP:0000486, HP:0000365, HP:0010804, HP:0000280, HP:0000158, HP:0002789, HP:0000316, HP:0003155, HP:0011800, HP:0001320, HP:0000364, HP:0000463, HP:0001344, HP:0000293 | S     | 25706356 |
| PIGL | 3988       | HP:0400005, HP:0010783, HP:0005280, HP:0004209, HP:0001682, HP:0000126, HP:0000989, HP:0002136, HP:0011927, HP:0002007, HP:0000405, HP:0000589, HP:0001250, HP:0000369, HP:0000358, HP:0008064, HP:0000343, HP:0000271, HP:0001019                                                                                                                                                                                                                                                                                                                                                                                                                                                             | S     | 22444671 |
| PIGL | 0680-2-3   | HP:0000175, HP:0002286, HP:0002213, HP:0012471, HP:0000316, HP:0000589, HP:0001250, HP:0000248, HP:0008064, HP:0011069, HP:0000687, HP:0000972, HP:0000431, HP:0001288, HP:0008591, HP:0008070, HP:0000396, HP:0000286, HP:0100040, HP:0001249, HP:0001638                                                                                                                                                                                                                                                                                                                                                                                                                                     | S     | 22444671 |
| PIGL | 0680-2-2   | HP:0000175, HP:0002286, HP:0002213, HP:0002059, HP:0012471, HP:0000316, HP:0000457, HP:0000589, HP:0001250, HP:0000248, HP:0008064, HP:0011069, HP:0000687, HP:0000972, HP:0000431, HP:0001288, HP:0008591, HP:0008070, HP:0000396, HP:0000286, HP:0100040, HP:0001249, HP:0001638                                                                                                                                                                                                                                                                                                                                                                                                             | S     | 22444671 |

Continued on next page

Table S1 – Continued from previous page

| Gene | Patient ID  | HPOs                                                                                                                                                                                                                                                                                                                                                                                                                                                                                                                                                                                        | Group | PMID     |
|------|-------------|---------------------------------------------------------------------------------------------------------------------------------------------------------------------------------------------------------------------------------------------------------------------------------------------------------------------------------------------------------------------------------------------------------------------------------------------------------------------------------------------------------------------------------------------------------------------------------------------|-------|----------|
| PIGL | 33300       | HP:0010047, HP:0000193, HP:0005280, HP:0010049,<br>HP:0100759, HP:0025474, HP:0002213, HP:0002059,<br>HP:0000958, HP:0100542, HP:0100760, HP:0001270,<br>HP:0000589, HP:0008064, HP:0000894, HP:0000377,<br>HP:0008070, HP:0009931, HP:0000286, HP:0000252,<br>HP:0001169, HP:0001999, HP:0001769, HP:0001945,<br>HP:0010783, HP:0004279, HP:0001943, HP:0010038,<br>HP:0012211, HP:0000989, HP:0002901, HP:0012471,<br>HP:0030148, HP:0005469, HP:0000405, HP:0000316,<br>HP:0000455, HP:0007808, HP:0001156, HP:0000322,<br>HP:0000972, HP:0000463, HP:0001598, HP:0100040,<br>HP:0001805 | S     | 22444671 |
| PIGL | 0682-2-1    | HP:0002286, HP:0002213, HP:0002059, HP:0012471,<br>HP:0000405, HP:0000316, HP:0000589, HP:0001250,<br>HP:0000248, HP:0008064, HP:0011069, HP:0000687,<br>HP:0000972, HP:0000431, HP:0001288, HP:0008070,<br>HP:0000396, HP:0000286, HP:0100040, HP:0001249,<br>HP:0001638                                                                                                                                                                                                                                                                                                                   | S     | 22444671 |
| PIGL | 277013      | HP:0002069, HP:0002194, HP:0000154, HP:0030084,<br>HP:0006347, HP:0010055, HP:0000107, HP:0000958,<br>HP:0003155, HP:0000405, HP:0000965, HP:0000767,<br>HP:0001263, HP:0000687, HP:0000365, HP:0009381,<br>HP:0003764                                                                                                                                                                                                                                                                                                                                                                      | S     | 28327575 |
| PIGM | Family 2-2B | HP:0002121, HP:0030242, HP:0030243                                                                                                                                                                                                                                                                                                                                                                                                                                                                                                                                                          | S     | 16767100 |
| PIGM | Family 2-2C | HP:0002121, HP:0030242, HP:0030243                                                                                                                                                                                                                                                                                                                                                                                                                                                                                                                                                          | S     | 16767100 |
| PIGM | Family 1-1B | HP:0002121, HP:0030242, HP:0030243                                                                                                                                                                                                                                                                                                                                                                                                                                                                                                                                                          | S     | 16767100 |
| PIGN | Patient     | HP:0001626, HP:0002089, HP:0001831, HP:0030030,<br>HP:0000054, HP:0000175, HP:0000110, HP:0012165,<br>HP:0002623, HP:0002566, HP:0000028, HP:0001060,<br>HP:0025193, HP:0003244, HP:0000776, HP:0000316,<br>HP:0000445, HP:0000377, HP:0000463, HP:0000271                                                                                                                                                                                                                                                                                                                                  | S     | 24852103 |
| PIGN | COLL-2.3    | HP:0000174, HP:0000110, HP:0000803, HP:0012718                                                                                                                                                                                                                                                                                                                                                                                                                                                                                                                                              | S     | 27038415 |
| PIGN | PIGN;V-2    | HP:0001615, HP:0002100, HP:0000072, HP:0001631,<br>HP:0000034, HP:0000639, HP:0001290, HP:0000219,<br>HP:0000646, HP:0002705, HP:0000400, HP:0000278,<br>HP:0000486, HP:0000341, HP:0001347, HP:0001337,<br>HP:0011271, HP:0001945, HP:0000194, HP:0002020,<br>HP:0002286, HP:0000126, HP:0000319, HP:0002305,<br>HP:0010880, HP:0000316, HP:0001182, HP:0000269,<br>HP:0001263, HP:0002090                                                                                                                                                                                                 | S     | 21493957 |
| PIGN | V-1         | HP:0004467, HP:0000194, HP:0001655, HP:0000034,<br>HP:0004969, HP:0000639, HP:0000646, HP:0002705,<br>HP:0000347, HP:0000269, HP:0001156, HP:0009748,<br>HP:0000774, HP:0000341, HP:0010804, HP:0000280                                                                                                                                                                                                                                                                                                                                                                                     | S     | 21493957 |
| PIGN | NSGC-7.4    | HP:0000174, HP:0000110, HP:0000803, HP:0012718                                                                                                                                                                                                                                                                                                                                                                                                                                                                                                                                              | S     | 27038415 |
| PIGN | Patient 1   | HP:0002384, HP:0012448, HP:0000076, HP:0010544,<br>HP:0000010, HP:0000639, HP:0012381, HP:0002705,<br>HP:0001272, HP:0000347, HP:0011398, HP:0000341,<br>HP:0003700, HP:0000286, HP:0010804, HP:0003324,<br>HP:0001337, HP:0000194, HP:0004396, HP:0002119,<br>HP:0000269, HP:0001263, HP:0001344, HP:0010506                                                                                                                                                                                                                                                                               | S     | 24253414 |

Continued on next page

Table S1 – Continued from previous page

| Gene | Patient ID      | HPOs                                                                                                                                                                                                                                                                                                          | Group | PMID     |
|------|-----------------|---------------------------------------------------------------------------------------------------------------------------------------------------------------------------------------------------------------------------------------------------------------------------------------------------------------|-------|----------|
| PIGN | Patient2        | HP:0002384, HP:0012448, HP:0000076, HP:0010544,<br>HP:0000010, HP:0000639, HP:0012381, HP:0002705,<br>HP:0001272, HP:0000347, HP:0011398, HP:0000341,<br>HP:0003700, HP:0000286, HP:0010804, HP:0003324,<br>HP:0001337, HP:0000194, HP:0004396, HP:0002119,<br>HP:0000269, HP:0001263, HP:0001344, HP:0010506 | S     | 24253414 |
| PIGN | male            | HP:0002384, HP:0012703, HP:0000174, HP:0002194,<br>HP:0002421, HP:0002353, HP:0002457, HP:0002533,<br>HP:0004305, HP:0003196, HP:0001263, HP:0100370,<br>HP:0100702, HP:0001344, HP:0100371                                                                                                                   | S     | 29096607 |
| PIGN | NSGC-7.3        | HP:0000174, HP:0000110, HP:0000803, HP:0012718                                                                                                                                                                                                                                                                | S     | 27038415 |
| PIGN | Patient 2       | HP:0006855, HP:0006956, HP:0100660, HP:0002123,<br>HP:0001272, HP:0025439, HP:0001250, HP:0010544,<br>HP:0000010, HP:0001336, HP:0001337, HP:0001290                                                                                                                                                          | S     | 26879448 |
| PIGN | 259633          | HP:0100543, HP:0001250, HP:0012444, HP:0002194,<br>HP:0007308, HP:0002205, HP:0001344                                                                                                                                                                                                                         | S     | 28327575 |
| PIGO | II-1 family A   | HP:0003155, HP:0001252, HP:0001263, HP:0010804,<br>HP:0002025, HP:0000316, HP:0000750, HP:0001270,<br>HP:0004322, HP:0000455, HP:0000431, HP:0006118,<br>HP:0000076, HP:0000637, HP:0002251                                                                                                                   | S     | 22683086 |
| PIGO | II-2 family A   | HP:0003155, HP:0001252, HP:0001263, HP:0010804,<br>HP:0002025, HP:0000316, HP:0004322, HP:0000750,<br>HP:0001270, HP:0000455, HP:0000431, HP:0006118,<br>HP:0000076, HP:0000637                                                                                                                               | S     | 22683086 |
| PIGO | II-1 family B   | HP:0001250, HP:0002265, HP:0001263, HP:0011316,<br>HP:0004969, HP:0000324, HP:0010804, HP:0000316,<br>HP:0002540, HP:0001270, HP:0000637, HP:0000494,<br>HP:0000508, HP:0001792, HP:0003155, HP:0004209,<br>HP:0000455, HP:0009642, HP:0000431, HP:0001631,<br>HP:0006118, HP:0001800, HP:0000252, HP:0009909 | S     | 22683086 |
| PIGO | Boy             | HP:0009882, HP:0002251, HP:0001636, HP:0002134,<br>HP:0008527, HP:0012501, HP:0002871, HP:0002352,<br>HP:0002104, HP:0003155, HP:0001272, HP:0011398,<br>HP:0000365, HP:0000297, HP:0001344, HP:0009381,<br>HP:0003429, HP:0031165, HP:0000271                                                                | S     | 24049131 |
| PIGO | Individual II-1 | HP:0002384, HP:0002069, HP:0002063, HP:0010864,<br>HP:0002510, HP:0002059, HP:0003155, HP:0002705,<br>HP:0001250, HP:0001263, HP:0200134, HP:0001252,<br>HP:0002072, HP:0010804, HP:0100275                                                                                                                   | S     | 24417746 |
| PIGO | Individual II-2 | HP:0002069, HP:0001263                                                                                                                                                                                                                                                                                        | S     | 24417746 |
| PIGO | 263039          | HP:0002251, HP:0002013, HP:0001810, HP:0002164,<br>HP:0000407, HP:0000219, HP:0001270, HP:0003155,<br>HP:0001263, HP:0001156, HP:0000364, HP:0001344,<br>HP:0000252, HP:0001817, HP:0001804                                                                                                                   | S     | 28327575 |
| PIGO | Patient 1       | HP:0002384, HP:0002100, HP:0008936, HP:0002079,<br>HP:0002120, HP:0011968, HP:0000817, HP:0002307,<br>HP:0004305, HP:0000758, HP:0008763, HP:0002835,<br>HP:0000711, HP:0001263, HP:0003560, HP:0001298,<br>HP:0002093, HP:0002090                                                                            | S     | 28900819 |
| PIGO | Patient 2       | HP:0012448, HP:0002100, HP:0008936, HP:0002079,<br>HP:0012736, HP:0001250, HP:0001263, HP:0002353,<br>HP:0000961, HP:0002120, HP:0002307, HP:0010818                                                                                                                                                          | S     | 28900819 |

Continued on next page



Table S1 – Continued from previous page

| Gene | Patient ID     | HPOs                                                                                           | Group | PMID     |
|------|----------------|------------------------------------------------------------------------------------------------|-------|----------|
| PIGP | Male proband   | HP:0002187, HP:0002457, HP:0003037, HP:0001344, HP:0200049                                     | S     | 28334793 |
|      |                | HP:0002079, HP:0006895, HP:0001250, HP:0001357, HP:0002094                                     |       |          |
|      |                | HP:0002353, HP:0002835, HP:0011398, HP:0002094, HP:0001618,                                    |       |          |
|      |                | HP:0010546, HP:0006380, HP:0000961, HP:0001618,                                                |       |          |
| PIGP | Female proband | HP:0002100, HP:0100704, HP:0002169, HP:0002835, HP:0000549                                     | S     | 28334793 |
|      |                | HP:0010553, HP:0000817, HP:0001347, HP:0002521,                                                |       |          |
|      |                | HP:0001250, HP:0002353,                                                                        |       |          |
| PIGQ | Patient        | HP:0010851, HP:0001371, HP:0012443, HP:0001250                                                 | S     | 24463883 |
| PIGV | Patient 5      | HP:0000750, HP:0011344, HP:0003155, HP:0010804, HP:0001831, HP:0000271, HP:0001336             | S     | 24129430 |
|      |                | HP:0001792, HP:0009381, HP:0000283, HP:0009882,                                                |       |          |
| PIGV | Patient 8      | HP:0002251, HP:0000072, HP:0000076, HP:0010055, HP:0000750, HP:0010804, HP:0000271             | S     | 24129430 |
|      |                | HP:0000021, HP:0001792, HP:0001250, HP:0011344, HP:0000431, HP:0001344, HP:0009381,            |       |          |
|      |                | HP:0002025, HP:0006118,                                                                        |       |          |
| PIGV | Patient 9      | HP:0001804, HP:0000316, HP:0000431, HP:0000175, HP:0001629, HP:0000072                         | S     | 24129430 |
|      |                | HP:0000455, HP:0000126, HP:0200007, HP:0010804,                                                |       |          |
|      |                | HP:0001821, HP:0003155,                                                                        |       |          |
| PIGV | Patient 1      | HP:0040255, HP:0005807, HP:0003155, HP:0009748, HP:0009617, HP:0005781, HP:0001629             | S     | 24129430 |
|      |                | HP:0002023, HP:0002335, HP:0000316, HP:0003037, HP:0000316, HP:0000455,                        |       |          |
|      |                | HP:0002251, HP:0000126, HP:0000175, HP:000175,                                                 |       |          |
| PIGV | Patient 7      | HP:0004378, HP:0000175, HP:0001250, HP:0000750, HP:0000271                                     | S     | 24129430 |
|      |                | HP:0002251, HP:0000126, HP:0001195, HP:0003155,                                                |       |          |
|      |                | HP:0002194, HP:0001655,                                                                        |       |          |
|      |                | HP:0000455, HP:0001252, HP:0011344, HP:0005484,                                                |       |          |
|      |                | HP:0009836, HP:0001344, HP:0005484,                                                            |       |          |
| PIGV | Patient 2      | HP:0009882, HP:0000316, HP:0000750, HP:0010804, HP:0000271, HP:0010819                         | S     | 24129430 |
|      |                | HP:0002251, HP:0000455, HP:0001252, HP:0011344,                                                |       |          |
|      |                | HP:0001821, HP:0003155,                                                                        |       |          |
| PIGV | Patient 3      | HP:0002251, HP:0000316, HP:0001252, HP:0000431, HP:0010804, HP:0000271                         | S     | 24129430 |
|      |                | HP:0006118, HP:000077, HP:0003155,                                                             |       |          |
|      |                | HP:00001250, HP:0000455, HP:0011398,                                                           |       |          |
|      |                | HP:0001252, HP:0011344, HP:0000750, HP:0009836,                                                |       |          |
| PIGV | Patient 6      | HP:0003155, HP:0000455, HP:0006895, HP:0000271, HP:0000081, HP:0002814                         | S     | 24129430 |
|      |                | HP:0000316, HP:0011398, HP:0001263, HP:0000750,                                                |       |          |
|      |                | HP:0002251, HP:0002194,                                                                        |       |          |
| PIGV | Patient 4      | HP:0002123, HP:0000316, HP:0001252, HP:0009381, HP:0005914, HP:0010804, HP:0000271             | S     | 24129430 |
|      |                | HP:0005490, HP:0000767, HP:0011344, HP:0000750, HP:0000431,                                    |       |          |
|      |                | HP:0001792, HP:0003155,                                                                        |       |          |
| PIGV | Patient 1      | HP:0006118, HP:0000637, HP:0011398, HP:0001545, HP:0002650, HP:0000378, HP:0000271, HP:0010819 | S     | 22315194 |
|      |                | HP:0002069, HP:0002714, HP:0000311, HP:0009894, HP:0000126, HP:0001520, HP:0000271, HP:0010819 |       |          |
|      |                | HP:0002019, HP:0000426, HP:0000256, HP:0000391, HP:0003155, HP:0001510, HP:0001344,            |       |          |
|      |                | HP:0001792, HP:0001270, HP:0010804, HP:0004378,                                                |       |          |
|      |                | HP:0001343, HP:0001344,                                                                        |       |          |

Continued on next page

Table S1 – Continued from previous page

| Gene  | Patient ID    | HPOs                                                                                                                                                                                                                                                                                                                                                 | Group | PMID     |
|-------|---------------|------------------------------------------------------------------------------------------------------------------------------------------------------------------------------------------------------------------------------------------------------------------------------------------------------------------------------------------------------|-------|----------|
| PIGV  | Patient 3     | HP:0000072, HP:0006118, HP:0002883, HP:0001195,<br>HP:0001250, HP:0000303, HP:0011398, HP:0011344,<br>HP:0010804, HP:0100023, HP:0200006, HP:0000280,<br>HP:0004378, HP:0010864, HP:0000077, HP:0000126,<br>HP:0005326, HP:0000316, HP:0000699, HP:0003155,<br>HP:0001061, HP:0011343, HP:0001263, HP:0000750,<br>HP:0001562, HP:0010746, HP:0001510 | S     | 22315194 |
| PIGV  | Patient 2     | HP:0002251, HP:0002013, HP:0001623, HP:0002558,<br>HP:0002714, HP:0000218, HP:0001270, HP:0001250,<br>HP:0000256, HP:0005484, HP:0010804, HP:0009894,<br>HP:0000391, HP:0004378, HP:0040262, HP:0012374,<br>HP:0003270, HP:0000126, HP:0003155, HP:0001263,<br>HP:0000378, HP:0010946, HP:0001520, HP:0001510,<br>HP:0001344, HP:0000271             | S     | 22315194 |
| PIGV  | Patient 4     | HP:0003155, HP:0000316, HP:0001250, HP:0002069,<br>HP:0011398, HP:0001263, HP:0000431, HP:0001344,<br>HP:0010804, HP:0001525, HP:0000280                                                                                                                                                                                                             | S     | 22315194 |
| PIGW  | Patient       | HP:0001999, HP:0003155, HP:0000431, HP:0000023,<br>HP:0012310, HP:0002521, HP:0010804                                                                                                                                                                                                                                                                | S     | 24367057 |
| PIGW  | Patient 1     | HP:0001270, HP:0001250, HP:0001252, HP:0002098,<br>HP:0001662, HP:0002527, HP:0010296, HP:0010819                                                                                                                                                                                                                                                    | S     | 27626616 |
| PIGW  | Patient 2     | HP:0002607, HP:0001270, HP:0002123, HP:0001250,<br>HP:0001263, HP:0001252, HP:0000158, HP:0010819                                                                                                                                                                                                                                                    | S     | 27626616 |
| PIGY  | Family A-II-1 | HP:0006965, HP:0006528, HP:0002013, HP:0004387,<br>HP:0006118, HP:0004691, HP:0002376, HP:0000938,<br>HP:0011947, HP:0000518, HP:0002987, HP:0011927,<br>HP:0025152, HP:0003155, HP:0006380, HP:0001250,<br>HP:0001385, HP:0001510, HP:0031165, HP:0003236                                                                                           | S     | 26293662 |
| PIGY  | Family B-II-2 | HP:0000504, HP:0001263, HP:0000750, HP:0000486,<br>HP:0005484, HP:0000718                                                                                                                                                                                                                                                                            | S     | 26293662 |
| PIGY  | Family B-II-3 | HP:0002194, HP:0000752, HP:0001263, HP:0000750,<br>HP:0008050, HP:0000252, HP:0000271, HP:0000154                                                                                                                                                                                                                                                    | S     | 26293662 |
| PIGY  | Family A-II-2 | HP:0000023, HP:0000938, HP:0010943, HP:0002027,<br>HP:0011927, HP:0000519, HP:0002835, HP:0003155,<br>HP:0002617, HP:0001250, HP:0003273, HP:0001561,<br>HP:0009826, HP:0001510, HP:0003236                                                                                                                                                          | S     | 26293662 |
| GPAA1 | 1a            | HP:0002066, HP:0002123, HP:0001272, HP:0001263,<br>HP:0001310, HP:0000938, HP:0025190, HP:0000639,<br>HP:0001249, HP:0011170, HP:0010819                                                                                                                                                                                                             | T+R   | 29100095 |
| GPAA1 | 1b            | HP:0002066, HP:0001260, HP:0001272, HP:0001263,<br>HP:0001310, HP:0000938, HP:0025190, HP:0000639,<br>HP:0001249, HP:0010819                                                                                                                                                                                                                         | T+R   | 29100095 |
| GPAA1 | 3a            | HP:0004322, HP:0002069, HP:0002464, HP:0000938,<br>HP:0000639, HP:0001290, HP:0000316, HP:0001272,<br>HP:0000411, HP:0001263, HP:0000520, HP:0000341,<br>HP:0000252, HP:0001249                                                                                                                                                                      | T+R   | 29100095 |
| GPAA1 | 3b            | HP:0002123, HP:0001272, HP:0002069, HP:0000411,<br>HP:0001263, HP:0000445, HP:0000520, HP:0000938,<br>HP:0000639, HP:0001249, HP:0001290                                                                                                                                                                                                             | T+R   | 29100095 |
| GPAA1 | 4a            | HP:0002066, HP:0004322, HP:0000938, HP:0000639,<br>HP:0001272, HP:0001263, HP:0001257, HP:0000463,<br>HP:0000341, HP:0011220, HP:0001249                                                                                                                                                                                                             | T+R   | 29100095 |
| GPAA1 | 4b            | HP:0002066, HP:0004322, HP:0000938, HP:0001272,<br>HP:0001263, HP:0001310, HP:0001257, HP:0000463,<br>HP:0000341, HP:0011220, HP:0001249                                                                                                                                                                                                             | T+R   | 29100095 |

Continued on next page

Table S1 – Continued from previous page

| Gene  | Patient ID | HPOs                                                                                                                                                                                                                                                                                  | Group | PMID     |
|-------|------------|---------------------------------------------------------------------------------------------------------------------------------------------------------------------------------------------------------------------------------------------------------------------------------------|-------|----------|
| GPAA1 | 4c         | HP:0002066, HP:0004322, HP:0000938, HP:0001260,<br>HP:0001272, HP:0001263, HP:0001310, HP:0001257,<br>HP:0000463, HP:0011220, HP:0001249                                                                                                                                              | T+R   | 29100095 |
| GPAA1 | 2          | HP:0002069, HP:0001263, HP:0100704, HP:0000938,<br>HP:0000463, HP:0000341, HP:0011220, HP:0001249,<br>HP:0001290                                                                                                                                                                      | T+R   | 29100095 |
| GPAA1 | 5b         | HP:0002066, HP:0001260, HP:0002069, HP:0001272,<br>HP:0001263, HP:0000445, HP:0001310, HP:0001249,<br>HP:0001290                                                                                                                                                                      | T+R   | 29100095 |
| GPAA1 | 5a         | HP:0002066, HP:0001260, HP:0002121, HP:0002069,<br>HP:0001272, HP:0001263, HP:0001310, HP:0001249,<br>HP:0010819, HP:0001290                                                                                                                                                          | T+R   | 29100095 |
| PGAP1 | Proband    | HP:0002099, HP:0001319, HP:0001263, HP:0000486,<br>HP:0009748, HP:0009904, HP:0011968, HP:0000395,<br>HP:0000582, HP:0000639, HP:0000490, HP:0002099,<br>HP:0001319, HP:0001263, HP:0000486, HP:0009748,<br>HP:0009904, HP:0011968, HP:0000395, HP:0000582,<br>HP:0000639, HP:0000490 | T+R   | 25804403 |
| PGAP1 | 1.2        | HP:0000733, HP:0008936, HP:0001270, HP:0004322,<br>HP:0000556, HP:0002791, HP:0000248, HP:0001263,<br>HP:0011344, HP:0000750, HP:0009062, HP:0002090                                                                                                                                  | T+R   | 26050939 |
| PGAP1 | 1.1        | HP:0000193, HP:0004322, HP:0006934, HP:0001508,<br>HP:0001642, HP:0001631, HP:0010055, HP:0000504,<br>HP:0000316, HP:0000556, HP:0000767, HP:0001263,<br>HP:0001252, HP:0000750, HP:0000664, HP:0001276,<br>HP:0001344, HP:0005484                                                    | T+R   | 26050939 |
| PGAP1 | II-1       | HP:0006801, HP:0012444, HP:0002421, HP:0002098,<br>HP:0000639, HP:0002104, HP:0001290, HP:0001270,<br>HP:0003487, HP:0000750, HP:0025047, HP:0011400,<br>HP:0005484, HP:0000496, HP:0001336, HP:0001337                                                                               | T+R   | 27206732 |
| PGAP1 | II-2       | HP:0012547, HP:0006801, HP:0012444, HP:0002421,<br>HP:0002098, HP:0012101, HP:0000639, HP:0002104,<br>HP:0001290, HP:0030874, HP:0001270, HP:0003487,<br>HP:0001250, HP:0025047, HP:0005484, HP:0001336,<br>HP:0001337                                                                | T+R   | 27206732 |
| PGAP1 | MR079      | HP:0000733, HP:0002121, HP:0001319, HP:0001270,<br>HP:0012444, HP:0000400, HP:0001263, HP:0010864,<br>HP:0000252                                                                                                                                                                      | T+R   | 24784135 |
| PGAP1 | Patient    | HP:0012448, HP:0012447, HP:0002079, HP:0012443,<br>HP:0100704, HP:0011968, HP:0100660, HP:0011398,<br>HP:0001263, HP:0000750, HP:0010845, HP:0012429,<br>HP:0000271, HP:0001249                                                                                                       | T+R   | 25823418 |

Continued on next page

Table S1 – Continued from previous page

| Gene  | Patient ID     | HPOs                                                                                                                                                                                                                                                                                                                                                                                                                                                                                                                                                                                                                                                                                                                                                       | Group | PMID     |
|-------|----------------|------------------------------------------------------------------------------------------------------------------------------------------------------------------------------------------------------------------------------------------------------------------------------------------------------------------------------------------------------------------------------------------------------------------------------------------------------------------------------------------------------------------------------------------------------------------------------------------------------------------------------------------------------------------------------------------------------------------------------------------------------------|-------|----------|
| PGAP2 | V:6/MR5        | HP:0003155, HP:0010864, HP:0002059, HP:0001270, HP:0001252, HP:0001305, HP:0003202, HP:0001324, HP:0003202, HP:0001252, HP:0004322, HP:0002536, HP:0001270, HP:0000486, HP:0001324, HP:0002121, HP:0010864, HP:0000750, HP:0001270, HP:0002121, HP:0010864, HP:0000750, HP:0001252, HP:0001324, HP:0002059, HP:0002121, HP:0004322, HP:0002360, HP:0010864, HP:0002059, HP:0002536, HP:0003155, HP:0001270, HP:0003202, HP:0001252, HP:0000750, HP:0000486, HP:0001324, HP:0001305, HP:0002121, HP:0004322, HP:0002360, HP:0010864, HP:0002059, HP:0002536, HP:0003155, HP:0001252, HP:0000750, HP:0001305, HP:0002121, HP:0004322, HP:0002360, HP:0010864, HP:0002059, HP:0001270, HP:0003202, HP:0001252, HP:0000750, HP:0000486, HP:0001324, HP:0001305 | T+R   | 23561846 |
| PGAP2 | IV:1-MR043     | HP:0003155, HP:0010864, HP:0002059, HP:0001270, HP:0001252, HP:0001305, HP:0003202, HP:0001324, HP:0003202, HP:0001252, HP:0004322, HP:0002536, HP:0001270, HP:0000486, HP:0001324, HP:0002121, HP:0010864, HP:0000750, HP:0001270, HP:0002121, HP:0010864, HP:0000750, HP:0001252, HP:0001324, HP:0002059, HP:0002121, HP:0004322, HP:0002360, HP:0010864, HP:0002059, HP:0002536, HP:0003155, HP:0001270, HP:0003202, HP:0001252, HP:0000750, HP:0000486, HP:0001324, HP:0001305, HP:0002121, HP:0004322, HP:0002360, HP:0010864, HP:0002059, HP:0001270, HP:0003202, HP:0001252, HP:0000750, HP:0000486, HP:0001324, HP:0001305                                                                                                                         | T+R   | 23561846 |
| PGAP2 | Patient 1      | HP:0009058, HP:0002521, HP:0003155, HP:0001252, HP:0002093, HP:0003324, HP:0011096, HP:0001946                                                                                                                                                                                                                                                                                                                                                                                                                                                                                                                                                                                                                                                             | T+R   | 26879448 |
| PGAP2 | Individual A   | HP:0003155, HP:0010804, HP:0001249                                                                                                                                                                                                                                                                                                                                                                                                                                                                                                                                                                                                                                                                                                                         | T+R   | 23561847 |
| PGAP2 | Individual B   | HP:0003155, HP:0010804, HP:0002025, HP:0001631, HP:0001270, HP:0011344, HP:0005484, HP:0010804, HP:0001249                                                                                                                                                                                                                                                                                                                                                                                                                                                                                                                                                                                                                                                 | T+R   | 23561847 |
| PGAP2 | Patient 2      | HP:0001270, HP:0001510, HP:0001250, HP:0000252, HP:0001250, HP:0001263, HP:0000252, HP:0001263, HP:0001249, HP:0001263, HP:0000750, HP:0001249                                                                                                                                                                                                                                                                                                                                                                                                                                                                                                                                                                                                             | T+R   | 27871432 |
| PGAP2 | Patient 4-IV-7 | HP:0003155, HP:0000805                                                                                                                                                                                                                                                                                                                                                                                                                                                                                                                                                                                                                                                                                                                                     | T+R   | 29119105 |
| PGAP2 | Patient 2-IV-5 | HP:0003155, HP:0031491, HP:0000708, HP:0000718                                                                                                                                                                                                                                                                                                                                                                                                                                                                                                                                                                                                                                                                                                             | T+R   | 29119105 |
| PGAP2 | Patient 3-IV-6 | HP:0003155, HP:0000716                                                                                                                                                                                                                                                                                                                                                                                                                                                                                                                                                                                                                                                                                                                                     | T+R   | 29119105 |
| PGAP2 | Patient 1-IV-3 | HP:0002373, HP:0001256, HP:0000716                                                                                                                                                                                                                                                                                                                                                                                                                                                                                                                                                                                                                                                                                                                         | T+R   | 29119105 |

Continued on next page

Table S1 – Continued from previous page

| Gene  | Patient ID        | HPOs                                                                                                                                                                                                                                                                                           | Group | PMID     |
|-------|-------------------|------------------------------------------------------------------------------------------------------------------------------------------------------------------------------------------------------------------------------------------------------------------------------------------------|-------|----------|
| PGAP3 | Patient7-Family7  | HP:0002187, HP:0000175, HP:0003194, HP:0000448, HP:0012390, HP:0000431, HP:0002079, HP:0002265, HP:0000028, HP:0000316, HP:0001250, HP:0000752, HP:0002069, HP:0000023, HP:0000717, HP:0001270, HP:0003763, HP:0005484, HP:0010804                                                             | T+R   | 28390064 |
| PGAP3 | Patient6-Family6  | HP:0002079, HP:0010864, HP:0003194, HP:0003155, HP:0000431, HP:0010804, HP:0007930, HP:0012714, HP:0002265, HP:0000717, HP:0000316, HP:0000752, HP:0002553, HP:0008501, HP:0000637, HP:0000448, HP:0001270, HP:0001344, HP:0005484                                                             | T+R   | 28390064 |
| PGAP3 | Patient4-Family4  | HP:0002079, HP:0002265, HP:0000637, HP:0001270, HP:0000431, HP:0010804, HP:0002553, HP:0002119, HP:0000448, HP:0000587, HP:0000752, HP:0000175, HP:0003194, HP:0003155, HP:0011398, HP:0001321, HP:0005484                                                                                     | T+R   | 28390064 |
| PGAP3 | Patient5-Family5  | HP:0002187, HP:0000175, HP:0000717, HP:0000316, HP:0000431, HP:0001344, HP:0010804, HP:0000060, HP:0002265, HP:0000637, HP:0001270, HP:0000767, HP:0002123, HP:0012880, HP:0000448, HP:0000767, HP:0002553, HP:0003194, HP:0003155, HP:0011398                                                 | T+R   | 28390064 |
| PGAP3 | Patient8-Family7  | HP:0002187, HP:0002265, HP:0030047, HP:0000316, HP:0011398, HP:0001344, HP:0010804, HP:0001357, HP:0001305, HP:0002079, HP:0002119, HP:0000637, HP:0001270, HP:0000431, HP:0000752, HP:0002123, HP:0003194, HP:0004325, HP:0003155, HP:0003763, HP:0005484                                     | T+R   | 28390064 |
| PGAP3 | Patient9-Family8  | HP:0002187, HP:0000175, HP:0000717, HP:0000316, HP:0000431, HP:0000540, HP:0010804, HP:0002079, HP:0002265, HP:0000637, HP:0001270, HP:0000752, HP:0002069, HP:0003194, HP:0000448, HP:0003763, HP:0001344, HP:0005484, HP:0001305, HP:0000028, HP:0003155, HP:0011398, HP:0005484             | T+R   | 28390064 |
| PGAP3 | Patient1-Family1  | HP:0002079, HP:0003194, HP:0000448, HP:0000204, HP:0000431, HP:0010804, HP:0002553, HP:0000639, HP:0003155, HP:0011398, HP:0001344, HP:0005484, HP:0001864, HP:0000717, HP:0000316, HP:0001270, HP:000202, HP:0001321, HP:0001433                                                              | T+R   | 28390064 |
| PGAP3 | Patient10-Family8 | HP:0002079, HP:0010864, HP:0000717, HP:0000316, HP:0000752, HP:0010804, HP:0001601, HP:0002265, HP:0000637, HP:0001270, HP:0001256, HP:0002553, HP:0000023, HP:0000448, HP:0011398, HP:0001344, HP:0005484, HP:0000175, HP:0003194, HP:0003155, HP:0000431, HP:0000540                         | T+R   | 28390064 |
| PGAP3 | Patient2-Family2  | HP:0002187, HP:0001643, HP:0000637, HP:0003155, HP:0000202, HP:0001344, HP:0002079, HP:0002265, HP:0000448, HP:0000822, HP:0000431, HP:0002092, HP:0010804, HP:0010808, HP:0002553, HP:0003194, HP:0000316, HP:0003763, HP:0000752, HP:0000175, HP:0000717, HP:0001270, HP:0011398, HP:0005484 | T+R   | 28390064 |

Continued on next page

Table S1 – Continued from previous page

| Gene  | Patient ID       | HPOs                                                                                                                                                                                                                                                                                                                                                                                                                | Group | PMID     |
|-------|------------------|---------------------------------------------------------------------------------------------------------------------------------------------------------------------------------------------------------------------------------------------------------------------------------------------------------------------------------------------------------------------------------------------------------------------|-------|----------|
| PGAP3 | Patient3-Family3 | HP:0002079, HP:0002069, HP:0002265, HP:0001631,<br>HP:0008501, HP:0003194, HP:0000637, HP:0000448,<br>HP:0001270, HP:0001250, HP:0011398, HP:0003186,<br>HP:0005484, HP:0010804, HP:0010808, HP:0002187,<br>HP:0002553, HP:0006872, HP:0000717, HP:0000316,<br>HP:0003155, HP:0000431, HP:0000752, HP:0001433,<br>HP:0001344                                                                                        | T+R   | 28390064 |
| PGAP3 | V-2-Family A     | HP:0002069, HP:0000175, HP:0002265, HP:0004305,<br>HP:0000218, HP:0003155, HP:0000316, HP:0001270,<br>HP:0003196, HP:0000455, HP:0003763, HP:0001263,<br>HP:0001252, HP:0000750, HP:0000431, HP:0005484,<br>HP:0010804, HP:0000582, HP:0010819                                                                                                                                                                      | T+R   | 24439110 |
| PGAP3 | II-1-Family C    | HP:0002079, HP:0002123, HP:0006956, HP:0002265,<br>HP:0003155, HP:0000316, HP:0001270, HP:0003196,<br>HP:0000455, HP:0001252, HP:0011344, HP:0000750,<br>HP:0000431, HP:0000752, HP:0011166, HP:0010804                                                                                                                                                                                                             | T+R   | 24439110 |
| PGAP3 | V-3-Family A     | HP:0002265, HP:0004305, HP:0000218, HP:0003155,<br>HP:0000316, HP:0001270, HP:0003196, HP:0000455,<br>HP:0003763, HP:0001263, HP:0001252, HP:0011344,<br>HP:0000750, HP:0000431, HP:0005484, HP:0010804,<br>HP:0000582                                                                                                                                                                                              | T+R   | 24439110 |
| PGAP3 | II-1-Family B    | HP:0004322, HP:0002123, HP:0002069, HP:0000637,<br>HP:0004325, HP:0003155, HP:0000316, HP:0001270,<br>HP:0001250, HP:0003196, HP:0000455, HP:0001263,<br>HP:0001252, HP:0011344, HP:0000750, HP:0000431,<br>HP:0001344, HP:0010804, HP:0000582                                                                                                                                                                      | T+R   | 24439110 |
| PGAP3 | V-1-Family A     | HP:0002069, HP:0000175, HP:0002265, HP:0004305,<br>HP:0000218, HP:0003155, HP:0000316, HP:0001270,<br>HP:0003196, HP:0000455, HP:0003763, HP:0001263,<br>HP:0001252, HP:0000750, HP:0000431, HP:0005484,<br>HP:0010804, HP:0010819                                                                                                                                                                                  | T+R   | 24439110 |
| PGAP3 | B-II-2           | HP:0002123, HP:0002360, HP:0008388, HP:0003155,<br>HP:0000316, HP:0001270, HP:0001251, HP:0003196,<br>HP:0000455, HP:0001263, HP:0001252, HP:0000750,<br>HP:0000431, HP:0000691, HP:0001500, HP:0010804,<br>HP:0002123, HP:0002360, HP:0008388, HP:0003155,<br>HP:0000316, HP:0001270, HP:0001251, HP:0003196,<br>HP:0000455, HP:0001263, HP:0001252, HP:0000750,<br>HP:0000431, HP:0000691, HP:0001500, HP:0010804 | T+R   | 27120253 |
| PGAP3 | A-II-1           | HP:0002123, HP:0002360, HP:0000175, HP:0000718,<br>HP:0000717, HP:0000637, HP:0000722, HP:0003155,<br>HP:0001270, HP:0410030, HP:0001250, HP:0001263,<br>HP:0000431, HP:0001344, HP:0010804, HP:0000582                                                                                                                                                                                                             | T+R   | 27120253 |
| PGAP3 | Younger sister   | HP:0002263, HP:0001612, HP:0000175, HP:0008848,<br>HP:0012169, HP:0002098, HP:0000708, HP:0045025,<br>HP:0000319, HP:0004325, HP:0003155, HP:0001263,<br>HP:0000750, HP:0009748, HP:0000278, HP:0000431,<br>HP:0000691, HP:0001344, HP:0005484, HP:0000286                                                                                                                                                          | T+R   | 28794914 |
| PGAP3 | Older Brother    | HP:0002263, HP:0001999, HP:0002373, HP:0004322,<br>HP:0000175, HP:0002098, HP:0008897, HP:0011968,<br>HP:0000508, HP:0000717, HP:0000319, HP:0001290,<br>HP:0000733, HP:0001270, HP:0001263, HP:0009748,<br>HP:0000431, HP:0000365, HP:0001344, HP:0010804,<br>HP:0000582, HP:0001629, HP:0000490                                                                                                                   | T+R   | 28794914 |

Continued on next page

Table S1 – Continued from previous page

| Gene  | Patient ID              | HPOs                                                                                                                                                                                                                                                                                                                                                                                                                                                                                                       | Group | PMID     |
|-------|-------------------------|------------------------------------------------------------------------------------------------------------------------------------------------------------------------------------------------------------------------------------------------------------------------------------------------------------------------------------------------------------------------------------------------------------------------------------------------------------------------------------------------------------|-------|----------|
| PGAP3 | 257982                  | HP:0012810, HP:0000175, HP:0000219, HP:0000286, HP:0010818, HP:0001763, HP:0003155, HP:0001344                                                                                                                                                                                                                                                                                                                                                                                                             | T+R   | 28327575 |
| PGAP3 | 257982-affected brother | HP:0008935, HP:0012345, HP:0000369, HP:0001488, HP:0002121, HP:0000319, HP:0002938, HP:0000403, HP:0006108, HP:0025335, HP:0004619, HP:0001357, HP:0002751, HP:0000316, HP:0000403, HP:0000687, HP:0002194, HP:0002136, HP:0003186, HP:0001305, HP:0000154, HP:0100543, HP:0000687, HP:0001344                                                                                                                                                                                                             | T+R   | 28327575 |
| PGAP3 | proband                 | HP:0001769, HP:0002650, HP:0000736, HP:0000369, HP:0000278, HP:0001769, HP:0002079, HP:0000175, HP:0001290, HP:0000347, HP:0000431, HP:0010804, HP:0001837, HP:0002360, HP:0002197, HP:0003155, HP:0003763, HP:0001118, HP:0000028, HP:0011443, HP:0001263, HP:0001344                                                                                                                                                                                                                                     | T+R   | 29531774 |
| PIGT  | Patient V-2             | HP:0002384, HP:0002750, HP:0005622, HP:0000496, HP:0002650, HP:0000505, HP:0006480, HP:0000271, HP:0100864                                                                                                                                                                                                                                                                                                                                                                                                 | T+R   | 23636107 |
| PIGT  | Patient V-1             | HP:0006429, HP:0011648, HP:0000767, HP:0009824, HP:0002650, HP:0002648, HP:0001520, HP:0000121, HP:0000639, HP:0000248, HP:0000496, HP:0010852, HP:0001263, HP:0000540, HP:0002750, HP:0004349, HP:0000486, HP:0011330, HP:0100704, HP:0003022, HP:0000121, HP:0001290, HP:0000256, HP:0004443, HP:0025330, HP:0001263, HP:0001249, HP:0000540, HP:0000271, HP:0001249                                                                                                                                     | T+R   | 23636107 |
| PIGT  | Patient V-5             | HP:0000072, HP:0100704, HP:0001272, HP:0009824, HP:0000540, HP:0003429, HP:0001249                                                                                                                                                                                                                                                                                                                                                                                                                         | T+R   | 23636107 |
| PIGT  | Patient V-4             | HP:0007360, HP:0000121, HP:0005622, HP:0003186, HP:0001638, HP:0000505, HP:0006480, HP:0100864, HP:0006429, HP:0002750, HP:0003100, HP:0009824, HP:0002123, HP:0002648, HP:0001520, HP:0000072, HP:0002283, HP:0002069, HP:0000121, HP:0004349, HP:0000639, HP:0003186, HP:0003429, HP:0001249, HP:0000072, HP:0000938, HP:0000248, HP:0000496, HP:0000472, HP:0003282, HP:0001263, HP:0000540, HP:0000271, HP:0002283, HP:0001290, HP:0000256, HP:0000472, HP:0003282, HP:0003022, HP:0000271, HP:0001249 | T+R   | 23636107 |

Continued on next page

Table S1 – Continued from previous page

| Gene | Patient ID     | HPOs                                                                                                                                                                                                                                                                                                                                                                                                                                                                                                                                                                   | Group | PMID     |
|------|----------------|------------------------------------------------------------------------------------------------------------------------------------------------------------------------------------------------------------------------------------------------------------------------------------------------------------------------------------------------------------------------------------------------------------------------------------------------------------------------------------------------------------------------------------------------------------------------|-------|----------|
| PIGT | Patient 2      | HP:0009127, HP:0005280, HP:0002069, HP:0010841, HP:0025458, HP:0001631, HP:0002720, HP:0000938, HP:0030718, HP:0002334, HP:0002059, HP:0000639, HP:0000924, HP:0002835, HP:0002714, HP:0002705, HP:0000545, HP:0003100, HP:0011994, HP:0000248, HP:0001250, HP:0001272, HP:0000767, HP:0011996, HP:0000486, HP:0000343, HP:0000365, HP:0000341, HP:0001513, HP:0009131, HP:0001337, HP:0001537, HP:0002187, HP:0002650, HP:0002870, HP:0002020, HP:0002850, HP:0100704, HP:0030856, HP:0030854, HP:0000348, HP:0001382, HP:0001263, HP:0000463, HP:0001336, HP:0010819 | T+R   | 25943031 |
| PIGT | Patient 1      | HP:0009127, HP:0005280, HP:0001657, HP:0002069, HP:0010841, HP:0025458, HP:0000938, HP:0002334, HP:0002059, HP:0000639, HP:0002835, HP:0002714, HP:0002705, HP:0003100, HP:0001272, HP:0000248, HP:0000486, HP:0000365, HP:0000343, HP:0000484, HP:0000341, HP:0001929, HP:0005616, HP:0001513, HP:0009131, HP:0003225, HP:0002155, HP:0002650, HP:0002020, HP:0100704, HP:0006254, HP:0000826, HP:0000348, HP:0011167, HP:0000463, HP:0001336                                                                                                                         | T+R   | 25943031 |
| PIGT | female proband | HP:0000072, HP:0005280, HP:0011648, HP:0000639, HP:0002059, HP:0008872, HP:0002714, HP:0000218, HP:0000787, HP:0001250, HP:0000347, HP:0000369, HP:0001272, HP:0001252, HP:0001561, HP:0000486, HP:0010804, HP:0000272, HP:0007366, HP:0002187, HP:0000071, HP:0002133, HP:0006913, HP:0002650, HP:0002119, HP:0000939, HP:0003282, HP:0000505, HP:0000463, HP:0000582                                                                                                                                                                                                 | T+R   | 24906948 |
| PIGT | 258094         | HP:0002373, HP:0006855, HP:0002069, HP:0002073, HP:0002465, HP:0025331, HP:0000505, HP:0001260, HP:0001270, HP:0000787, HP:0001182, HP:0001251, HP:0001272, HP:0001250, HP:0000657, HP:0000455, HP:0001263, HP:0000490                                                                                                                                                                                                                                                                                                                                                 | T+R   | 28327575 |
| PIGT | 270250         | HP:0002187, HP:0040288, HP:0007141, HP:0001250, HP:0001283, HP:3000033, HP:0200134, HP:0002353, HP:0000252, HP:0003282, HP:0100765, HP:0011471                                                                                                                                                                                                                                                                                                                                                                                                                         | T+R   | 28327575 |
| PIGT | 270306         | HP:0002187, HP:0040288, HP:0007141, HP:0001250, HP:0001283, HP:3000033, HP:0200134, HP:0002353, HP:0000252, HP:0003282, HP:0100765, HP:0011471                                                                                                                                                                                                                                                                                                                                                                                                                         | T+R   | 28327575 |



Table S2: GPI-anchored proteins

| Protein                                                                                                                                                                                                                                                                   | Symbol   |
|---------------------------------------------------------------------------------------------------------------------------------------------------------------------------------------------------------------------------------------------------------------------------|----------|
| Acetylcholinesterase (AChE) (EC 3.1.1.7)                                                                                                                                                                                                                                  | ACHE     |
| Intestinal-type alkaline phosphatase (IAP) (Intestinal alkaline phosphatase) (EC 3.1.3.1)                                                                                                                                                                                 | ALPI     |
| Alkaline phosphatase, tissue-nonspecific isozyme (AP-TNAP) (TNSALP) (EC 3.1.3.1) (Alkaline phosphatase liver/bone/kidney isozyme)                                                                                                                                         | ALPL     |
| Alkaline phosphatase, placental type (EC 3.1.3.1) (Alkaline phosphatase Regan isozyme) (Placental alkaline phosphatase 1) (PLAP-1)                                                                                                                                        | ALPP     |
| Alkaline phosphatase, placental-like (EC 3.1.3.1) (ALP-1) (Alkaline phosphatase Nagao isozyme) (Germ cell alkaline phosphatase) (GCAP) (Placental alkaline phosphatase-like) (PLAP-like)                                                                                  | ALPPL2   |
| GPI-linked NAD(P)(+)-arginine ADP-ribosyltransferase 1 (EC 2.4.2.31) (ADP-ribosyltransferase C2 and C3 toxin-like 1) (ARTC1) (Mono(ADP-ribosyl)transferase 1) (CD antigen CD296)                                                                                          | ART1     |
| Ecto-ADP-ribosyltransferase 3 (EC 2.4.2.31) (ADP-ribosyltransferase C2 and C3 toxin-like 3) (ARTC3) (Mono(ADP-ribosyl)transferase 3) (NAD(P)(+)-arginine ADP-ribosyltransferase 3)                                                                                        | ART3     |
| Ecto-ADP-ribosyltransferase 4 (EC 2.4.2.31) (ADP-ribosyltransferase C2 and C3 toxin-like 4) (ARTC4) (Dombrock blood group carrier molecule) (Mono(ADP-ribosyl)transferase 4) (NAD(P)(+)-arginine ADP-ribosyltransferase 4) (CD antigen CD297)                             | ART4     |
| Brevican core protein (Brain-enriched hyaluronan-binding protein) (BEHAB) (Chondroitin sulfate proteoglycan 7)                                                                                                                                                            | BCAN     |
| ADP-ribosyl cyclase/cyclic ADP-ribose hydrolase 2 (EC 3.2.2.6) (ADP-ribosyl cyclase 2) (Bone marrow stromal antigen 1) (BST-1) (Cyclic ADP-ribose hydrolase 2) (cADPr hydrolase 2) (CD antigen CD157)                                                                     | BST1     |
| Bone marrow stromal antigen 2 (BST-2) (HM1.24 antigen) (Tetherin) (CD antigen CD317)                                                                                                                                                                                      | BST2     |
| Carbonic anhydrase 4 (EC 4.2.1.1) (Carbonate dehydratase IV) (Carbonic anhydrase IV) (CA-IV)                                                                                                                                                                              | CA4      |
| Calcium channel, voltage-dependent, alpha-2/delta subunit 2                                                                                                                                                                                                               | CACNA2D2 |
| CD109 antigen (150 kDa TGF-beta-1-binding protein) (C3 and PZP-like alpha-2-macroglobulin domain-containing protein 7) (Platelet-specific Gov antigen) (p180) (r150) (CD antigen CD109)                                                                                   | CD109    |
| Monocyte differentiation antigen CD14 (Myeloid cell-specific leucine-rich glycoprotein) (CD antigen CD14) [Cleaved into: Monocyte differentiation antigen CD14, urinary form; Monocyte differentiation antigen CD14, membrane-bound form]                                 | CD14     |
| CD160 antigen (Natural killer cell receptor BY55) (CD antigen CD160)                                                                                                                                                                                                      | CD160    |
| CD177 antigen (Human neutrophil alloantigen 2a) (HNA-2a) (NB1 glycoprotein) (NB1 GP) (Polycythemia rubra vera protein 1) (PRV-1) (CD antigen CD177)                                                                                                                       | CD177    |
| Signal transducer CD24 (Small cell lung carcinoma cluster 4 antigen) (CD antigen CD24)                                                                                                                                                                                    | CD24     |
| CD48 antigen (B-lymphocyte activation marker BLAST-1) (BCM1 surface antigen) (Leukocyte antigen MEM-102) (SLAM family member 2) (SLAMF2) (Signaling lymphocytic activation molecule 2) (TCT.1) (CD antigen CD48)                                                          | CD48     |
| CAMPATH-1 antigen (CDw52) (Cambridge pathology 1 antigen) (Epididymal secretory protein E5) (Human epididymis-specific protein 5) (He5) (CD antigen CD52)                                                                                                                 | CD52     |
| Complement decay-accelerating factor (CD antigen CD55)                                                                                                                                                                                                                    | CD55     |
| Cd58, LFA3, lymphocyte function-associated antigen, type 3                                                                                                                                                                                                                | CD58     |
| CD59 glycoprotein (1F5 antigen) (20 kDa homologous restriction factor) (HRF-20) (HRF20) (MAC-inhibitory protein) (MAC-IP) (MEM43 antigen) (Membrane attack complex inhibition factor) (MACIF) (Membrane inhibitor of reactive lysis) (MIRL) (Protectin) (CD antigen CD59) | CD59     |
| Cadherin-13 (Heart cadherin) (H-cadherin) (P105) (Truncated cadherin) (T-cad) (T-cadherin)                                                                                                                                                                                | CDH13    |
| Carcinoembryonic antigen-related cell adhesion molecule 5 (Carcinoembryonic antigen) (CEA) (Meconium antigen 100) (CD antigen CD66e)                                                                                                                                      | CEACAM5  |

*Continued on next page*

Table S2 – Continued from previous page

| Protein                                                                                                                                                                                                                                     | Symbol   |
|---------------------------------------------------------------------------------------------------------------------------------------------------------------------------------------------------------------------------------------------|----------|
| Carcinoembryonic antigen-related cell adhesion molecule 6 (Non-specific crossreacting antigen) (Normal cross-reacting antigen) (CD antigen CD66c)                                                                                           | CEACAM6  |
| Carcinoembryonic antigen-related cell adhesion molecule 7 (Carcinoembryonic antigen CGM2)                                                                                                                                                   | CEACAM7  |
| Carcinoembryonic antigen-related cell adhesion molecule 8 (CD67 antigen) (Carcinoembryonic antigen CGM6) (Non-specific cross-reacting antigen NCA-95) (CD antigen CD66b)                                                                    | CEACAM8  |
| Cryptic protein (Cryptic family protein 1)                                                                                                                                                                                                  | CFC1     |
| Ciliary neurotrophic factor receptor subunit alpha (CNTF receptor subunit alpha) (CNTFR-alpha)                                                                                                                                              | CNTFR    |
| Contactin-1 (Glycoprotein gp135) (Neural cell surface protein F3)                                                                                                                                                                           | CNTN1    |
| Contactin-2 (Axonal glycoprotein TAG-1) (Axonin-1) (Transient axonal glycoprotein 1) (TAX-1)                                                                                                                                                | CNTN2    |
| Contactin-3 (Brain-derived immunoglobulin superfamily protein 1) (BIG-1) (Plasmacytoma-associated neuronal glycoprotein)                                                                                                                    | CNTN3    |
| Contactin-4 (Brain-derived immunoglobulin superfamily protein 2) (BIG-2)                                                                                                                                                                    | CNTN4    |
| Contactin-5 (Neural recognition molecule NB-2) (hNB-2)                                                                                                                                                                                      | CNTN5    |
| Contactin-6 (Neural recognition molecule NB-3) (hNB-3)                                                                                                                                                                                      | CNTN6    |
| Carboxypeptidase M (CPM) (EC 3.4.17.12)                                                                                                                                                                                                     | CPM      |
| Carboxypeptidase O (CPO) (EC 3.4.17.-)                                                                                                                                                                                                      | CPO      |
| Dipeptidase (EC 3.4.13.19)                                                                                                                                                                                                                  | DPEP1    |
| Dipeptidase (EC 3.4.13.19) (Fragment)                                                                                                                                                                                                       | DPEP2    |
| Dipeptidase 3 (EC 3.4.13.19)                                                                                                                                                                                                                | DPEP3    |
| Ephrin-A1 (EPH-related receptor tyrosine kinase ligand 1) (LERK-1) (Immediate early response protein B61) (Tumor necrosis factor alpha-induced protein 4) (TNF alpha-induced protein 4) [Cleaved into: Ephrin-A1, secreted form]            | EFNA1    |
| Ephrin-A2 (EPH-related receptor tyrosine kinase ligand 6) (LERK-6) (HEK7 ligand) (HEK7-L)                                                                                                                                                   | EFNA2    |
| Ephrin-A3 (EFL-2) (EHK1 ligand) (EHK1-L) (EPH-related receptor tyrosine kinase ligand 3) (LERK-3)                                                                                                                                           | EFNA3    |
| Ephrin-A4 (EPH-related receptor tyrosine kinase ligand 4) (LERK-4)                                                                                                                                                                          | EFNA4    |
| Ephrin-A5 (AL-1) (EPH-related receptor tyrosine kinase ligand 7) (LERK-7)                                                                                                                                                                   | EFNA5    |
| Ectonucleotide pyrophosphatase/phosphodiesterase family member 6 (E-NPP 6) (NPP-6) (EC 3.1.4.-) (EC 3.1.4.38) (Choline-specific glycerophosphodiester phosphodiesterase) (Glycerophosphocholine cholinephosphodiesterase) (GPC-Cpde)        | ENPP6    |
| Low affinity immunoglobulin gamma Fc region receptor III-B (Fc-gamma RIII-beta) (Fc-gamma RIII) (Fc-gamma RIIIb) (FcRIII) (FcRIIIb) (FcR-10) (IgG Fc receptor III-1) (CD antigen CD16b)                                                     | FCGR3B   |
| Folate receptor alpha (FR-alpha) (Adult folate-binding protein) (FBP) (Folate receptor 1) (Folate receptor, adult) (KB cells FBP) (Ovarian tumor-associated antigen MOv18)                                                                  | FOLR1    |
| Folate receptor beta (FR-beta) (Folate receptor 2) (Folate receptor, fetal/placental) (Placental folate-binding protein) (FBP)                                                                                                              | FOLR2    |
| Folate receptor gamma (FR-gamma) (Folate receptor 3)                                                                                                                                                                                        | FOLR3    |
| Growth arrest-specific protein 1 (GAS-1)                                                                                                                                                                                                    | GAS1     |
| GDNF family receptor alpha-1 (GDNF receptor alpha-1) (GDNFR-alpha-1) (GFR-alpha-1) (RET ligand 1) (TGF-beta-related neurotrophic factor receptor 1)                                                                                         | GFRA1    |
| GDNF family receptor alpha-2 (GDNF receptor alpha-2) (GDNFR-alpha-2) (GFR-alpha-2) (GDNF receptor beta) (GDNFR-beta) (Neurturin receptor alpha) (NRTNR-alpha) (NTNR-alpha) (RET ligand 2) (TGF-beta-related neurotrophic factor receptor 2) | GFRA2    |
| GDNF family receptor alpha-3 (GDNF receptor alpha-3) (GDNFR-alpha-3) (GFR-alpha-3)                                                                                                                                                          | GFRA3    |
| GDNF family receptor alpha-4 (GDNF receptor alpha-4) (GDNFR-alpha-4) (GFR-alpha-4) (Persephin receptor)                                                                                                                                     | GFRA4    |
| GLIPR1-like protein 1                                                                                                                                                                                                                       | GLIPR1L1 |
| Glycosyl-phosphatidylinositol-anchored molecule-like protein                                                                                                                                                                                | GML      |

Continued on next page

Table S2 – Continued from previous page

| Protein                                                                                                                                                                                      | Symbol  |
|----------------------------------------------------------------------------------------------------------------------------------------------------------------------------------------------|---------|
| Pancreatic secretory granule membrane major glycoprotein GP2 (Pancreatic zymogen granule membrane protein GP-2) (ZAP75)                                                                      | GP2     |
| Glypican-1 [Cleaved into: Secreted glypican-1]                                                                                                                                               | GPC1    |
| Glypican-2 [Cleaved into: Secreted glypican-2]                                                                                                                                               | GPC2    |
| Glypican-3 (Fragment)                                                                                                                                                                        | GPC3    |
| K-glypican                                                                                                                                                                                   | GPC4    |
| Glypican-5 [Cleaved into: Secreted glypican-5]                                                                                                                                               | GPC5    |
| Glypican-6 [Cleaved into: Secreted glypican-6]                                                                                                                                               | GPC6    |
| Glycosylphosphatidylinositol-anchored high density lipoprotein-binding protein 1 (GPI-HBP1) (GPI-anchored HDL-binding protein 1) (High density lipoprotein-binding protein 1)                | GPIHBP1 |
| Hemojuvelin (Hemochromatosis type 2 protein) (RGM domain family member C)                                                                                                                    | HFE2    |
| Hyaluronidase-2 (Hyal-2) (EC 3.2.1.35) (Hyaluronoglucosaminidase-2) (Lung carcinoma protein 2) (LuCa-2)                                                                                      | HYAL2   |
| Immunoglobulin superfamily member 21 (IgSF21)                                                                                                                                                | IGSF21  |
| Intelectin-1 (ITLN-1) (Endothelial lectin HL-1) (Galactofuranose-binding lectin) (Intestinal lactoferrin receptor) (Omentin)                                                                 | ITLN1   |
| Sperm-egg fusion protein Juno (Folate receptor 4) (Folate receptor delta) (FR-delta) (IZUMO1 receptor protein JUNO)                                                                          | IZUMO1R |
| Lipoprotein lipase (LPL) (EC 3.1.1.34)                                                                                                                                                       | LPL     |
| Limbic system-associated membrane protein (LSAMP) (IgLON family member 3)                                                                                                                    | LSAMP   |
| Lymphocyte antigen 6D (Ly-6D) (E48 antigen)                                                                                                                                                  | LY6D    |
| Lymphocyte antigen 6E (Ly-6E) (Retinoic acid-induced gene E protein) (RIG-E) (Stem cell antigen 2) (SCA-2) (Thymic shared antigen 1) (TSA-1)                                                 | LY6E    |
| Lymphocyte antigen 6 complex locus protein G6c                                                                                                                                               | LY6G6C  |
| Lymphocyte antigen 6 complex locus protein G6d (Protein Ly6-D) (Megakaryocyte-enhanced gene transcript 1 protein)                                                                            | LY6G6D  |
| Lymphocyte antigen 6H (Ly-6H)                                                                                                                                                                | LY6H    |
| Lymphocyte antigen 6K (Ly-6K)                                                                                                                                                                | LY6K    |
| Lymphocyte antigen 6L (Lymphocyte antigen 6 complex locus protein L)                                                                                                                         | LY6L    |
| Ly-6/neurotoxin-like protein 1 (Endogenous prototoxin LYNX1) (Testicular tissue protein Li 112)                                                                                              | LYNX1   |
| Ly6/PLAUR domain-containing protein 1 (Putative HeLa tumor suppressor) (PHTS)                                                                                                                | LYPD1   |
| Ly6/PLAUR domain-containing protein 2                                                                                                                                                        | LYPD2   |
| Ly6/PLAUR domain-containing protein 3 (GPI-anchored metastasis-associated protein C4.4A homolog) (Matrigel-induced gene C4 protein) (MIG-C4)                                                 | LYPD3   |
| Ly6/PLAUR domain-containing protein 4                                                                                                                                                        | LYPD4   |
| Ly6/PLAUR domain-containing protein 5                                                                                                                                                        | LYPD5   |
| Ly6/PLAUR domain-containing protein 6                                                                                                                                                        | LYPD6   |
| Ly6/PLAUR domain-containing protein 6B                                                                                                                                                       | LYPD6B  |
| Ly6/PLAUR domain-containing protein 8                                                                                                                                                        | LYPD8   |
| MAM domain-containing glycosylphosphatidylinositol anchor protein 1 (Fragment)                                                                                                               | MDGA1   |
| MAM domain-containing glycosylphosphatidylinositol anchor protein 2                                                                                                                          | MDGA2   |
| Melanotransferrin (Melanoma-associated antigen p97) (CD antigen CD228)                                                                                                                       | MELTF   |
| Matrix metalloproteinase-17 (MMP-17) (EC 3.4.24.-) (Membrane-type matrix metalloproteinase 4) (MT-MMP 4) (MTMMP4) (Membrane-type-4 matrix metalloproteinase) (MT4-MMP) (MT4MMP)              | MMP17   |
| Matrix metalloproteinase-25 (MMP-25) (EC 3.4.24.-) (Leukolysin) (Membrane-type matrix metalloproteinase 6) (MT-MMP 6) (MTMMP6) (Membrane-type-6 matrix metalloproteinase) (MT6-MMP) (MT6MMP) | MMP25   |
| Mesothelin (CAK1 antigen) (Pre-pro-megakaryocyte-potentiating factor) [Cleaved into: Megakaryocyte-potentiating factor (MPF); Mesothelin, cleaved form]                                      | MSLN    |
| Neural cell adhesion molecule 1 (N-CAM-1) (NCAM-1) (CD antigen CD56)                                                                                                                         | NCAM1   |
| Neuronal growth regulator 1 (IgLON family member 4)                                                                                                                                          | NEGR1   |
| Neuritin                                                                                                                                                                                     | NRN1    |
| Neuritin-like protein                                                                                                                                                                        | NRN1L   |
| 5'-nucleotidase (5'-NT) (EC 3.1.3.5) (Ecto-5'-nucleotidase) (CD antigen CD73)                                                                                                                | NT5E    |
| Neurotrimin (hNT) (IgLON family member 2)                                                                                                                                                    | NTM     |

Continued on next page

Table S2 – Continued from previous page

| Protein                                                                                                                                                                                                                                                                                                                                                       | Symbol    |
|---------------------------------------------------------------------------------------------------------------------------------------------------------------------------------------------------------------------------------------------------------------------------------------------------------------------------------------------------------------|-----------|
| Netrin-G1 (Laminct-1)                                                                                                                                                                                                                                                                                                                                         | NTNG1     |
| Netrin-G2 (Laminct-2)                                                                                                                                                                                                                                                                                                                                         | NTNG2     |
| Oligodendrocyte-myelin glycoprotein                                                                                                                                                                                                                                                                                                                           | OMG       |
| Opioid-binding protein/cell adhesion molecule (OBCAM) (OPCML) (Opioid-binding cell adhesion molecule) (IgLON family member 1)                                                                                                                                                                                                                                 | OPCML     |
| Otoancorin                                                                                                                                                                                                                                                                                                                                                    | OTOA      |
| Urokinase plasminogen activator surface receptor (U-PAR) (uPAR) (Monocyte activation antigen Mo3) (CD antigen CD87)                                                                                                                                                                                                                                           | PLAUR     |
| Placenta-expressed transcript 1 protein                                                                                                                                                                                                                                                                                                                       | PLET1     |
| Prion-like protein doppel (PrPLP) (Prion protein 2)                                                                                                                                                                                                                                                                                                           | PRND      |
| Major prion protein (PrP) (ASCR) (PrP27-30) (PrP33-35C) (CD antigen CD230)                                                                                                                                                                                                                                                                                    | PRNP      |
| Testisin (EC 3.4.21.-) (Eosinophil serine protease 1) (ESP-1) (Serine protease 21)                                                                                                                                                                                                                                                                            | PRSS21    |
| Serine protease 41 (EC 3.4.21.-) (Testis serine protease 1) (TESSP-1)                                                                                                                                                                                                                                                                                         | PRSS41    |
| Prostate stem cell antigen                                                                                                                                                                                                                                                                                                                                    | PSCA      |
| UL16 binding protein 5 (Retinoic acid early transcript 1G protein)                                                                                                                                                                                                                                                                                            | RAET1G    |
| UL16-binding protein 6 (Retinoic acid early transcript 1L protein)                                                                                                                                                                                                                                                                                            | RAET1L    |
| Reversion-inducing cysteine-rich protein with Kazal motifs (hRECK) (Suppressor of tumorigenicity 15 protein)                                                                                                                                                                                                                                                  | RECK      |
| Repulsive guidance molecule A (RGM domain family member A)                                                                                                                                                                                                                                                                                                    | RGMA      |
| RGM domain family member B (DRG11-responsive axonal guidance and outgrowth of neurite) (DRAGON)                                                                                                                                                                                                                                                               | RGMB      |
| Reticulon-4 receptor (Nogo receptor) (NgR) (Nogo-66 receptor)                                                                                                                                                                                                                                                                                                 | RTN4R     |
| Reticulon-4 receptor-like 1 (Nogo receptor-like 2) (Nogo-66 receptor homolog 2) (Nogo-66 receptor-related protein 3) (NgR3)                                                                                                                                                                                                                                   | RTN4RL1   |
| Reticulon-4 receptor-like 2 (Nogo receptor-like 3) (Nogo-66 receptor homolog 1) (Nogo-66 receptor-related protein 2) (NgR2)                                                                                                                                                                                                                                   | RTN4RL2   |
| Semaphorin-7A (CDw108) (JMH blood group antigen) (John-Milton-Hargen human blood group Ag) (Semaphorin-K1) (Sema K1) (Semaphorin-L) (Sema L) (CD antigen CD108)                                                                                                                                                                                               | SEMA7A    |
| Acid sphingomyelinase-like phosphodiesterase 3b (ASM-like phosphodiesterase 3b) (EC 3.1.4.-)                                                                                                                                                                                                                                                                  | SMPDL3B   |
| Sperm acrosome membrane-associated protein 4 (Sperm acrosomal membrane-associated protein 14)                                                                                                                                                                                                                                                                 | SPACA4    |
| Hyaluronidase PH-20 (Hyal-PH20) (EC 3.2.1.35) (Hyaluronoglucosaminidase PH-20) (Sperm adhesion molecule 1) (Sperm surface protein PH-20)                                                                                                                                                                                                                      | SPAM1     |
| Shadow of prion protein (Protein shadoo)                                                                                                                                                                                                                                                                                                                      | SPRN      |
| Teratocarcinoma-derived growth factor 1 (Cripto-1 growth factor) (CRGF) (Epidermal growth factor-like cripto protein CR1)                                                                                                                                                                                                                                     | TDGF1     |
| Alpha-tectorin                                                                                                                                                                                                                                                                                                                                                | TECTA     |
| Beta-tectorin                                                                                                                                                                                                                                                                                                                                                 | TECTB     |
| Testis-expressed protein 101 (Cell surface receptor NYD-SP8) (Scleroderma-associated autoantigen) (Spermatogenesis-related gene protein)                                                                                                                                                                                                                      | TEX101    |
| Tissue factor pathway inhibitor (TFPI) (Extrinsic pathway inhibitor) (EPI) (Lipoprotein-associated coagulation inhibitor) (LACI)                                                                                                                                                                                                                              | TFPI      |
| Thy-1 membrane glycoprotein (CDw90) (Thy-1 antigen) (CD antigen CD90)                                                                                                                                                                                                                                                                                         | THY1      |
| Tumor necrosis factor receptor superfamily member 10C (Antagonist decoy receptor for TRAIL/Apo-2L) (Decoy TRAIL receptor without death domain) (Decoy receptor 1) (DcR1) (Lymphocyte inhibitor of TRAIL) (TNF-related apoptosis-inducing ligand receptor 3) (TRAIL receptor 3) (TRAIL-R3) (TRAIL receptor without an intracellular domain) (CD antigen CD263) | TNFRSF10C |
| Trehalase (EC 3.2.1.28) (Alpha, alpha-trehalase) (Alpha, alpha-trehalose glucohydrolase)                                                                                                                                                                                                                                                                      | TREH      |
| UL16-binding protein 1 (ALCAN-beta) (NKG2D ligand 1) (N2DL-1) (NKG2DL1) (Retinoic acid early transcript 1I)                                                                                                                                                                                                                                                   | ULBP1     |
| UL16-binding protein 2 (ALCAN-alpha) (NKG2D ligand 2) (N2DL-2) (NKG2DL2) (Retinoic acid early transcript 1H)                                                                                                                                                                                                                                                  | ULBP2     |
| UL16-binding protein 3 (ALCAN-gamma) (NKG2D ligand 3) (N2DL-3) (NKG2DL3) (Retinoic acid early transcript 1N)                                                                                                                                                                                                                                                  | ULBP3     |

Continued on next page

Table S2 – *Continued from previous page*

| Protein                                                                                                                                                                              | Symbol  |
|--------------------------------------------------------------------------------------------------------------------------------------------------------------------------------------|---------|
| Uromodulin (Tamm-Horsfall urinary glycoprotein) (THP) [Cleaved into: Uromodulin, secreted form]                                                                                      | UMOD    |
| Pantetheinase (EC 3.5.1.92) (Pantetheine hydrolase) (Tiff66) (Vascular non-inflammatory molecule 1) (Vanin-1)                                                                        | VNN1    |
| Vascular non-inflammatory molecule 2 (Vanin-2) (EC 3.5.1.92) (Glycosylphosphatidyl inositol-anchored protein GPI-80) (Protein FOAP-4)                                                | VNN2    |
| Vascular non-inflammatory molecule 3 (Vanin-3) (EC 3.5.1.92)                                                                                                                         | VNN3    |
| Xaa-Pro aminopeptidase 2 (EC 3.4.11.9) (Aminoacylproline aminopeptidase) (Membrane-bound aminopeptidase P) (Membrane-bound APP) (Membrane-bound AmP) (mAmP) (X-Pro aminopeptidase 2) | XPNPEP2 |

Table **S3**: Phenotypic comparison of Synthesis+Transamidase (S/T) vs. Remodeling groups

| HPO ID     | HPO label                                           | S/T            | Remodelling    | $\chi^2$ | p-val (adj) |
|------------|-----------------------------------------------------|----------------|----------------|----------|-------------|
| HP:0000079 | <i>Abnormality of the urinary system</i>            | 35/113 (31.0%) | 1/39 (2.6%)    | 12.946   | 0.04648     |
| HP:0010935 | <i>Abnormality of the upper urinary tract</i>       | 34/113 (30.1%) | 0/39 (0.0%)    | 15.116   | 0.01466     |
| HP:0000708 | <i>Behavioral abnormality</i>                       | 15/113 (13.3%) | 24/39 (61.5%)  | 35.407   | 0           |
| HP:0012758 | <i>Neurodevelopmental delay</i>                     | 72/113 (63.7%) | 39/39 (100.0%) | 19.377   | 0.00156     |
| HP:0000750 | <i>Delayed speech and language development</i>      | 34/113 (30.1%) | 30/39 (76.9%)  | 26.089   | 0.00005     |
| HP:0001270 | <i>Motor delay</i>                                  | 22/113 (19.5%) | 29/39 (74.4%)  | 39.181   | 0           |
| HP:0040195 | <i>Decreased head circumference</i>                 | 21/113 (18.6%) | 19/39 (48.7%)  | 13.577   | 0.03319     |
| HP:0000252 | <i>Microcephaly</i>                                 | 20/113 (17.7%) | 19/39 (48.7%)  | 14.625   | 0.01902     |
| HP:0005484 | <i>Postnatal microcephaly</i>                       | 13/113 (11.5%) | 16/39 (41.0%)  | 16.366   | 0.00757     |
| HP:0000598 | <i>Abnormality of the ear</i>                       | 27/113 (23.9%) | 22/39 (56.4%)  | 14.033   | 0.02604     |
| HP:0031703 | <i>Abnormal ear morphology</i>                      | 21/113 (18.6%) | 21/39 (53.8%)  | 18.029   | 0.00316     |
| HP:0000356 | <i>Abnormality of the outer ear</i>                 | 18/113 (15.9%) | 21/39 (53.8%)  | 21.853   | 0.00043     |
| HP:0000377 | <i>Abnormality of the pinna</i>                     | 17/113 (15.0%) | 18/39 (46.2%)  | 15.831   | 0.01004     |
| HP:0100886 | <i>Abnormality of globe location</i>                | 26/113 (23.0%) | 22/39 (56.4%)  | 14.971   | 0.01583     |
| HP:0000316 | <i>Hypertelorism</i>                                | 23/113 (20.4%) | 20/39 (51.3%)  | 13.671   | 0.03158     |
| HP:0030669 | <i>Abnormal morphology of the ocular adnexa</i>     | 20/113 (17.7%) | 21/39 (53.8%)  | 19.232   | 0.00168     |
| HP:0000492 | <i>Abnormal eyelid morphology</i>                   | 19/113 (16.8%) | 20/39 (51.3%)  | 18.058   | 0.00311     |
| HP:0008050 | <i>Abnormality of the palpebral fissures</i>        | 13/113 (11.5%) | 18/39 (46.2%)  | 21.44    | 0.00053     |
| HP:0200007 | <i>Abnormal size of the palpebral fissures</i>      | 7/113 (6.2%)   | 14/39 (35.9%)  | 21.483   | 0.00052     |
| HP:0000422 | <i>Abnormality of the nasal bridge</i>              | 23/113 (20.4%) | 22/39 (56.4%)  | 18.086   | 0.00306     |
| HP:0000431 | <i>Wide nasal bridge</i>                            | 13/113 (11.5%) | 22/39 (56.4%)  | 32.987   | 0           |
| HP:0000159 | <i>Abnormality of the lip</i>                       | 32/113 (28.3%) | 24/39 (61.5%)  | 13.751   | 0.03027     |
| HP:0000177 | <i>Abnormality of upper lip</i>                     | 28/113 (24.8%) | 24/39 (61.5%)  | 17.407   | 0.00437     |
| HP:0011339 | <i>Abnormality of upper lip vermilion</i>           | 23/113 (20.4%) | 24/39 (61.5%)  | 23.023   | 0.00023     |
| HP:0010804 | <i>Tented upper lip vermilion</i>                   | 20/113 (17.7%) | 21/39 (53.8%)  | 19.232   | 0.00168     |
| HP:0100737 | <i>Abnormality of the hard palate</i>               | 6/113 (5.3%)   | 17/39 (43.6%)  | 33.084   | 0           |
| HP:0000202 | <i>Oral cleft</i>                                   | 6/113 (5.3%)   | 18/39 (46.2%)  | 36.377   | 0           |
| HP:0000175 | <i>Cleft palate</i>                                 | 6/113 (5.3%)   | 17/39 (43.6%)  | 33.084   | 0           |
| HP:0001939 | <i>Abnormality of metabolism/homeostasis</i>        | 54/113 (47.8%) | 32/39 (82.1%)  | 13.855   | 0.02863     |
| HP:0012379 | <i>Abnormal enzyme/coenzyme activity</i>            | 37/113 (32.7%) | 31/39 (79.5%)  | 25.624   | 0.00006     |
| HP:0004379 | <i>Abnormality of alkaline phosphatase activity</i> | 37/113 (32.7%) | 31/39 (79.5%)  | 25.624   | 0.00006     |
| HP:0003155 | <i>Elevated alkaline phosphatase</i>                | 32/113 (28.3%) | 31/39 (79.5%)  | 31.28    | 0           |

Table S4: Publications curated for this work

| Author        | Title                                                                                                                                                                    | Year | PMID     |
|---------------|--------------------------------------------------------------------------------------------------------------------------------------------------------------------------|------|----------|
| Abdel-Hamid   | PGAP3-related hyperphosphatasia with mental retardation syndrome: Report of 10 new patients and a homozygous founder mutation.                                           | 2017 | 28390064 |
| Almeida       | Hypomorphic promoter mutation in PIGM causes glycosylphosphatidylinositol deficiency                                                                                     | 2006 | 16767100 |
| Barone        | DPM2-CDG: a muscular dystrophy-dystroglycanopathy syndrome with severe epilepsy.                                                                                         | 2012 | 23109149 |
| Belet         | Early frameshift mutation in PIGA identified a large XLID family without neonatal lethality.                                                                             | 2014 | 24357517 |
| Bosch         | Cerebral visual impairment and intellectual disability caused by PGAP1 variants.                                                                                         | 2015 | 25804403 |
| Brady         | Exome sequencing identifies a recessive PIGN splice site mutation as a cause of syndromic congenital diaphragmatic hernia                                                | 2014 | 24852103 |
| Ceroni JR1    | Large deletion in PIGL: a common mutational mechanism in CHIME syndrome?                                                                                                 | 2018 | 29473937 |
| Chiyonobu     | Glycosylphosphatidylinositol (GPI) anchor deficiency caused by mutations in PIGW is associated with WEST syndrome and hyperphosphatasia with mental retardation syndrome | 2014 | 24367057 |
| Edvarson      | Mutations in the phosphatidylinositol glycan C (PIGC) gene are associated with epilepsy and intellectual disability.                                                     | 2017 | 27694521 |
| Fujiwara      | Mutations in PIGL in a patient with Mabry syndrome                                                                                                                       | 2015 |          |
| Granzow       | Loss of function of PGAP1 as a cause of severe encephalopathy identified by Whole Exome Sequencing: Lessons of the bioinformatics pipeline.                              | 2015 | 26050939 |
| Hansen        | Hypomorphic mutations in PGAP2, encoding a GPI-anchor-remodeling protein, cause autosomal-recessive intellectual disability.                                             | 2013 | 23561846 |
| Hogrebe       | A novel mutation in PIGW causes glycosylphosphatidylinositol deficiency without hyperphosphatasia                                                                        | 2016 | 27626616 |
| Horn          | Delineation of PIGV mutation spectrum and associated phenotypes in hyperphosphatasia with mental retardation syndrome                                                    | 2014 | 24129430 |
| Howard        | Mutations in PGAP3 impair GPI-anchor maturation, causing a subtype of hyperphosphatasia with mental retardation.                                                         | 2014 | 24439110 |
| Ilkovski      | Mutations in PIGY: expanding the phenotype of inherited glycosylphosphatidylinositol deficiencies                                                                        | 2015 | 26293662 |
| Jezela-Stanek | Congenital disorder of glycosylphosphatidylinositol (GPI)-anchor biosynthesis—The phenotype of two patients with novel mutations in the PIGN and PGAP2 genes             | 2016 | 26879448 |
| Johnston      | The phenotype of a germline mutation in PIGA: the gene somatically mutated paroxysmal nocturnal hemoglobinuria                                                           | 2012 | 22305531 |
| Johnstone     | Compound heterozygous mutations in the gene PIGP are associated with early infantile epileptic encephalopathy.                                                           | 2017 | 28334793 |
| Kato          | PIGA mutations cause early onset epileptic encephalopathies and distinctive features                                                                                     | 2014 | 24706016 |

*Continued on next page*

Table S4 – Continued from previous page

| Author        | Title                                                                                                                                                                        | Year | PMID     |
|---------------|------------------------------------------------------------------------------------------------------------------------------------------------------------------------------|------|----------|
| Kettwig       | Compound heterozygous variants in PGAP1 causing severe psychomotor retardation, brain atrophy, recurrent apneas and delayed myelination: a case report and literature review | 2016 | 27206732 |
| Kim           | Dolichol phosphate mannose synthase (DPM1) mutations define congenital disorder of glycosylation Ie (CDG-Ie)                                                                 | 2000 | 10642597 |
| Knaus         | Rare Noncoding Mutations Extend the Mutational Spectrum in the PGAP3 Subtype of Hyperphosphatasia with Mental Retardation Syndrome.                                          | 2016 | 27120253 |
| Krawitz       | PGAP2 mutations, affecting the GPI-anchor-synthesis pathway, cause hyperphosphatasia with mental retardation syndrome                                                        | 2013 | 23561847 |
| Krawitz       | Mutations in PIGO, a member of the GPI-anchor-synthesis pathway, cause hyperphosphatasia with mental retardation                                                             | 2012 |          |
| Kuki          | B6-responsive epilepsy due to inherited GPI deficiency                                                                                                                       | 2013 | 24049131 |
| Kvamung       | A novel intellectual disability syndrome caused by GPI anchor deficiency due to homozygous mutations in PIGT                                                                 | 2013 | 23636107 |
| Lam           | Expanding the clinical and molecular characteristics of PIGT-CDG, a disorder of glycosylphosphatidylinositol anchors.                                                        | 2015 | 25943031 |
| Lefebeder     | Deficiency of Dol-P-Man synthase subunit DPM3 bridges the congenital disorders of glycosylation with the dystroglycanopathies.                                               | 2009 | 19576565 |
| Lin           | We report the first family with PIGA-associated epileptic encephalopathy in Taiwan and hope to elucidate its special phenotype and inheritance pattern.                      | 2018 | 29656098 |
| Makrythanasis | Pathogenic Variants in PIGG Cause Intellectual Disability with Seizures and Hypotonia                                                                                        | 2016 | 26996948 |
| Martin        | Clinical whole-genome sequencing in severe early-onset epilepsy reveals new genes and improves molecular diagnosis                                                           | 2014 |          |
| Maydan        | Multiple congenital anomalies-hypotonia-seizures syndrome is caused by a mutation in PIGN                                                                                    | 2011 | 21493957 |
| McInerney-Leo | Fryns Syndrome Associated with Recessive Mutations in PIGN in two Separate Families.                                                                                         | 2016 | 27038415 |
| Murakami      | Null mutation in PGAP1 impairing Gpi-anchor maturation in patients with intellectual disability and encephalopathy.                                                          | 2014 | 24784135 |
| Nakamura      | PIGO mutations in intractable epilepsy and severe developmental delay with mild elevation of alkaline phosphatase levels                                                     | 2014 | 24417746 |
| Nakashima     | Novel compound heterozygous PIGT mutations caused multiple congenital anomalies-hypotonia seizures syndrome 3                                                                | 2014 | 24906948 |
| Nampoothiri   | Hyperphosphatasia with Mental Retardation Syndrome Due to a Novel Mutation in PGAP3                                                                                          | 2017 | 28794914 |
| Naseer        | A novel mutation in PGAP2 gene causes developmental delay, intellectual disability, epilepsy and microcephaly in consanguineous Saudi family.                                | 2016 | 27871432 |
| Ng            | Mutations in the glycosylphosphatidylinositol gene PIGL cause CHIME syndrome.                                                                                                | 2012 |          |
| Nguyen        | Mutations in GPAA1, Encoding a GPI Transamidase Complex Protein, Cause Developmental Delay, Epilepsy, Cerebellar Atrophy, and Osteopenia.                                    | 2017 | 29100095 |

Continued on next page



Table S4 – *Continued from previous page*

| Author          | Title                                                                                                                                                                                                                            | Year | PMID           |
|-----------------|----------------------------------------------------------------------------------------------------------------------------------------------------------------------------------------------------------------------------------|------|----------------|
| Nguyen          | A PIGH mutation leading to GPI deficiency is associated with developmental delay and autism.                                                                                                                                     | 2018 | 29603516       |
| Ohba            | PIGN mutations cause congenital anomalies, developmental delay, hypotonia, epilepsy, and progressive cerebellar atrophy                                                                                                          | 2014 | 24253414       |
| Pagnamenta      | A homozygous variant disrupting the PIGH start-codon is associated with developmental delay, epilepsy, and microcephaly.                                                                                                         | 2018 | PMID: 29573052 |
| Pagnamenta      | Analysis of exome data for 4293 trios suggests GPI-anchor biogenesis defects are a rare cause of developmental disorders.                                                                                                        | 2017 | 28327575       |
| Perez           | A Rare Variant in PGAP2 Causes Autosomal Recessive Hyperphosphatasia with Mental Retardation Syndrome, with a Mild Phenotype in Heterozygous Carriers.                                                                           | 2017 | 29119105       |
| Sakaguchi       | A novel PGAP3 mutation in a Croatian boy with brachytelephalangy and a thin corpus callosum.                                                                                                                                     | 2017 | 29531774       |
| Schenk          | MPDU1 mutations underlie a novel human congenital disorder of glycosylation, designated type If.                                                                                                                                 | 2001 | 11733564       |
| Swoboda         | A novel germline PIGA mutation in Ferro-Cerebro-Cutaneous syndrome: a neurodegenerative X-linked epileptic encephalopathy with systemic iron-overload                                                                            | 2014 | 24259288       |
| Tarailo-Graovac | The genotypic and phenotypic spectrum of PIGA deficiency                                                                                                                                                                         | 2015 |                |
| Thiffault       | Hypotonia and intellectual disability without dysmorphic features in a patient with PIGN-related disease                                                                                                                         | 2017 | 29096607       |
| Thompson        | Phenotypic variability in hyperphosphatasia with seizures and neurologic deficit (Mabry syndrome).                                                                                                                               | 2012 | 22315194       |
| Van den Bergh   | A homozygous DPM3 mutation in a patient with alpha-dystroglycan-related limb girdle muscular dystrophy                                                                                                                           | 2017 | 28803818       |
| Van der Crabben | Expanding the spectrum of phenotypes associated with germline PIGA mutations: a child with developmental delay, accelerated linear growth, facial dysmorphisms, elevated alkaline phosphatase, and progressive CNS abnormalities | 2014 | 24259184       |
| Williams        | Additional evidence that PGAP1 loss of function causes autosomal recessive global developmental delay and encephalopathy.                                                                                                        | 2015 | 25823418       |
| Xie LL          | A novel germline PIGA mutation causes early-onset epileptic encephalopathies in Chinese monozygotic twins.                                                                                                                       | 2018 | 29502866       |
| Yang            | Congenital disorder of glycosylation due to DPM1 mutations presenting with dystroglycanopathy-type congenital muscular dystrophy.                                                                                                | 2013 | 23856421       |
| Zehavi          | A homozygous PIGO mutation associated with severe infantile epileptic encephalopathy and corpus callosum hypoplasia, but normal alkaline phosphatase levels.                                                                     | 2017 | 28900819       |
